# Supplementary material for: Characterization of the liver immune microenvironment in liver biopsies from patients with chronic HBV infection
Source: PubMed Central journal article supplement — JHEP Rep. 2021 Oct 24;4(1):100388. doi: 10.1016/j.jhepr.2021.100388 (PMC8671126; doi:10.1016/j.jhepr.2021.100388), 2021-10-24
Supplement: mmc3.pdf [file mmc3.pdf]

## ICMJE DISCLOSURE FORM

Date: 08/15/2021 \_\_\_\_\_

Your Name: Abhishek Aggarwal \_\_\_\_\_

Manuscript Title: Characterization of the Liver Immune Microenvironment in Chronic HBV Infected Patient Liver Biopsies \_\_\_\_\_

Manuscript number (if known): \_\_\_\_\_

In the interest of transparency, we ask you to disclose all relationships/activities/interests listed below that are related to the content of your manuscript. "Related" means any relation with for-profit or not-for-profit third parties whose interests may be affected by the content of the manuscript. Disclosure represents a commitment to transparency and does not necessarily indicate a bias. If you are in doubt about whether to list a relationship/activity/interest, it is preferable that you do so.

The following questions apply to the author's relationships/activities/interests as they relate to the current manuscript only.

The author's relationships/activities/interests should be defined broadly. For example, if your manuscript pertains to the epidemiology of hypertension, you should declare all relationships with manufacturers of antihypertensive medication, even if that medication is not mentioned in the manuscript.

In item #1 below, report all support for the work reported in this manuscript without time limit. For all other items, the time frame for disclosure is the past 36 months.

|                                                           |                                                                                                                                                                                | Name all entities with whom you have this relationship or indicate none (add rows as needed) | Specifications/Comments (e.g., if payments were made to you or to your institution) |
|-----------------------------------------------------------|--------------------------------------------------------------------------------------------------------------------------------------------------------------------------------|----------------------------------------------------------------------------------------------|-------------------------------------------------------------------------------------|
| <b>Time frame: Since the initial planning of the work</b> |                                                                                                                                                                                |                                                                                              |                                                                                     |
| 1                                                         | All support for the present manuscript (e.g., funding, provision of study materials, medical writing, article processing charges, etc.)<br><b>No time limit for this item.</b> | ___ None<br>Gilead Sciences                                                                  |                                                                                     |
|                                                           |                                                                                                                                                                                |                                                                                              |                                                                                     |
|                                                           |                                                                                                                                                                                |                                                                                              |                                                                                     |
|                                                           |                                                                                                                                                                                |                                                                                              |                                                                                     |
|                                                           |                                                                                                                                                                                |                                                                                              |                                                                                     |
|                                                           |                                                                                                                                                                                |                                                                                              |                                                                                     |
| <b>Time frame: past 36 months</b>                         |                                                                                                                                                                                |                                                                                              |                                                                                     |
| 2                                                         | Grants or contracts from any entity (if not indicated in item #1 above).                                                                                                       | <u>  X  </u> None                                                                            |                                                                                     |
|                                                           |                                                                                                                                                                                |                                                                                              |                                                                                     |
|                                                           |                                                                                                                                                                                |                                                                                              |                                                                                     |
| 3                                                         | Royalties or licenses                                                                                                                                                          | <u>  X  </u> None                                                                            |                                                                                     |
|                                                           |                                                                                                                                                                                |                                                                                              |                                                                                     |

|    |                                                                                                              |                                                  |  |
|----|--------------------------------------------------------------------------------------------------------------|--------------------------------------------------|--|
|    |                                                                                                              |                                                  |  |
| 4  | Consulting fees                                                                                              | <input checked="" type="checkbox"/> None         |  |
|    |                                                                                                              |                                                  |  |
|    |                                                                                                              |                                                  |  |
| 5  | Payment or honoraria for lectures, presentations, speakers bureaus, manuscript writing or educational events | <input checked="" type="checkbox"/> None         |  |
|    |                                                                                                              |                                                  |  |
|    |                                                                                                              |                                                  |  |
| 6  | Payment for expert testimony                                                                                 | <input type="checkbox"/> None                    |  |
|    |                                                                                                              |                                                  |  |
|    |                                                                                                              |                                                  |  |
| 7  | Support for attending meetings and/or travel                                                                 | <input checked="" type="checkbox"/> None         |  |
|    |                                                                                                              |                                                  |  |
|    |                                                                                                              |                                                  |  |
| 8  | Patents planned, issued or pending                                                                           | <input checked="" type="checkbox"/> None         |  |
|    |                                                                                                              |                                                  |  |
|    |                                                                                                              |                                                  |  |
| 9  | Participation on a Data Safety Monitoring Board or Advisory Board                                            | <input checked="" type="checkbox"/> None         |  |
|    |                                                                                                              |                                                  |  |
|    |                                                                                                              |                                                  |  |
| 10 | Leadership or fiduciary role in other board, society, committee or advocacy group, paid or unpaid            | <input checked="" type="checkbox"/> None         |  |
|    |                                                                                                              |                                                  |  |
|    |                                                                                                              |                                                  |  |
| 11 | Stock or stock options                                                                                       | <input type="checkbox"/> None<br>Gilead Sciences |  |
|    |                                                                                                              |                                                  |  |
|    |                                                                                                              |                                                  |  |
| 12 | Receipt of equipment, materials, drugs, medical writing, gifts or other services                             | <input checked="" type="checkbox"/> None         |  |
|    |                                                                                                              |                                                  |  |
|    |                                                                                                              |                                                  |  |
| 13 | Other financial or non-financial interests                                                                   | <input checked="" type="checkbox"/> None         |  |
|    |                                                                                                              |                                                  |  |
|    |                                                                                                              |                                                  |  |

Please place an "X" next to the following statement to indicate your agreement:

I certify that I have answered every question and have not altered the wording of any of the questions on this form.

## ICMJE DISCLOSURE FORM

Date: August 16 2021  
 Your Name: Christina Moon  
 Manuscript Title: \_\_\_\_\_  
 Manuscript number (if known): \_\_\_\_\_

In the interest of transparency, we ask you to disclose all relationships/activities/interests listed below that are related to the content of your manuscript. "Related" means any relation with for-profit or not-for-profit third parties whose interests may be affected by the content of the manuscript. Disclosure represents a commitment to transparency and does not necessarily indicate a bias. If you are in doubt about whether to list a relationship/activity/interest, it is preferable that you do so.

The following questions apply to the author's relationships/activities/interests as they relate to the current manuscript only.

The author's relationships/activities/interests should be defined broadly. For example, if your manuscript pertains to the epidemiology of hypertension, you should declare all relationships with manufacturers of antihypertensive medication, even if that medication is not mentioned in the manuscript.

In item #1 below, report all support for the work reported in this manuscript without time limit. For all other items, the time frame for disclosure is the past 36 months.

|                                                           |                                                                                                                                                                                | Name all entities with whom you have this relationship or indicate none (add rows as needed) | Specifications/Comments (e.g., if payments were made to you or to your institution) |
|-----------------------------------------------------------|--------------------------------------------------------------------------------------------------------------------------------------------------------------------------------|----------------------------------------------------------------------------------------------|-------------------------------------------------------------------------------------|
| <b>Time frame: Since the initial planning of the work</b> |                                                                                                                                                                                |                                                                                              |                                                                                     |
| 1                                                         | All support for the present manuscript (e.g., funding, provision of study materials, medical writing, article processing charges, etc.)<br><b>No time limit for this item.</b> | _____<br>Gilead Sciences                                                                     |                                                                                     |
|                                                           |                                                                                                                                                                                |                                                                                              |                                                                                     |
|                                                           |                                                                                                                                                                                |                                                                                              |                                                                                     |
|                                                           |                                                                                                                                                                                |                                                                                              |                                                                                     |
|                                                           |                                                                                                                                                                                |                                                                                              |                                                                                     |
|                                                           |                                                                                                                                                                                |                                                                                              |                                                                                     |
|                                                           |                                                                                                                                                                                |                                                                                              |                                                                                     |
| <b>Time frame: past 36 months</b>                         |                                                                                                                                                                                |                                                                                              |                                                                                     |
| 2                                                         | Grants or contracts from any entity (if not indicated in item #1 above).                                                                                                       | _X_ None                                                                                     |                                                                                     |
|                                                           |                                                                                                                                                                                |                                                                                              |                                                                                     |
| 3                                                         | Royalties or licenses                                                                                                                                                          | _X_ None                                                                                     |                                                                                     |
|                                                           |                                                                                                                                                                                |                                                                                              |                                                                                     |
|                                                           |                                                                                                                                                                                |                                                                                              |                                                                                     |

|    |                                                                                                              |                                             |  |
|----|--------------------------------------------------------------------------------------------------------------|---------------------------------------------|--|
| 4  | Consulting fees                                                                                              | <input type="checkbox"/> None               |  |
|    |                                                                                                              |                                             |  |
|    |                                                                                                              |                                             |  |
| 5  | Payment or honoraria for lectures, presentations, speakers bureaus, manuscript writing or educational events | <input type="checkbox"/> None               |  |
|    |                                                                                                              |                                             |  |
|    |                                                                                                              |                                             |  |
| 6  | Payment for expert testimony                                                                                 | <input type="checkbox"/> None               |  |
|    |                                                                                                              |                                             |  |
|    |                                                                                                              |                                             |  |
| 7  | Support for attending meetings and/or travel                                                                 | <input type="checkbox"/> None               |  |
|    |                                                                                                              |                                             |  |
|    |                                                                                                              |                                             |  |
| 8  | Patents planned, issued or pending                                                                           | <input type="checkbox"/> None               |  |
|    |                                                                                                              |                                             |  |
|    |                                                                                                              |                                             |  |
| 9  | Participation on a Data Safety Monitoring Board or Advisory Board                                            | <input type="checkbox"/> None               |  |
|    |                                                                                                              |                                             |  |
|    |                                                                                                              |                                             |  |
| 10 | Leadership or fiduciary role in other board, society, committee or advocacy group, paid or unpaid            | <input type="checkbox"/> None               |  |
|    |                                                                                                              |                                             |  |
|    |                                                                                                              |                                             |  |
| 11 | Stock or stock options                                                                                       | <input type="checkbox"/><br>Gilead Sciences |  |
|    |                                                                                                              |                                             |  |
|    |                                                                                                              |                                             |  |
| 12 | Receipt of equipment, materials, drugs, medical writing, gifts or other services                             | <input type="checkbox"/> None               |  |
|    |                                                                                                              |                                             |  |
|    |                                                                                                              |                                             |  |
| 13 | Other financial or non-financial interests                                                                   | <input type="checkbox"/> None               |  |
|    |                                                                                                              |                                             |  |
|    |                                                                                                              |                                             |  |

Please place an "X" next to the following statement to indicate your agreement:

I certify that I have answered every question and have not altered the wording of any of the questions on this form.

## ICMJE DISCLOSURE FORM

Date: 8/16/20201 \_\_\_\_\_  
 Your Name: Diana Chen \_\_\_\_\_  
 Manuscript Title: \_\_\_\_\_  
 Manuscript number (if known): \_\_\_\_\_

In the interest of transparency, we ask you to disclose all relationships/activities/interests listed below that are related to the content of your manuscript. "Related" means any relation with for-profit or not-for-profit third parties whose interests may be affected by the content of the manuscript. Disclosure represents a commitment to transparency and does not necessarily indicate a bias. If you are in doubt about whether to list a relationship/activity/interest, it is preferable that you do so.

The following questions apply to the author's relationships/activities/interests as they relate to the current manuscript only.

The author's relationships/activities/interests should be defined broadly. For example, if your manuscript pertains to the epidemiology of hypertension, you should declare all relationships with manufacturers of antihypertensive medication, even if that medication is not mentioned in the manuscript.

In item #1 below, report all support for the work reported in this manuscript without time limit. For all other items, the time frame for disclosure is the past 36 months.

|                                                           |                                                                                                                                                                                | Name all entities with whom you have this relationship or indicate none (add rows as needed) | Specifications/Comments (e.g., if payments were made to you or to your institution) |
|-----------------------------------------------------------|--------------------------------------------------------------------------------------------------------------------------------------------------------------------------------|----------------------------------------------------------------------------------------------|-------------------------------------------------------------------------------------|
| <b>Time frame: Since the initial planning of the work</b> |                                                                                                                                                                                |                                                                                              |                                                                                     |
| 1                                                         | All support for the present manuscript (e.g., funding, provision of study materials, medical writing, article processing charges, etc.)<br><b>No time limit for this item.</b> | ___ Gilead Sciences, Inc                                                                     |                                                                                     |
|                                                           |                                                                                                                                                                                |                                                                                              |                                                                                     |
|                                                           |                                                                                                                                                                                |                                                                                              |                                                                                     |
|                                                           |                                                                                                                                                                                |                                                                                              |                                                                                     |
|                                                           |                                                                                                                                                                                |                                                                                              |                                                                                     |
|                                                           |                                                                                                                                                                                |                                                                                              |                                                                                     |
|                                                           |                                                                                                                                                                                |                                                                                              |                                                                                     |
| <b>Time frame: past 36 months</b>                         |                                                                                                                                                                                |                                                                                              |                                                                                     |
| 2                                                         | Grants or contracts from any entity (if not indicated in item #1 above).                                                                                                       | ___ None                                                                                     |                                                                                     |
|                                                           |                                                                                                                                                                                |                                                                                              |                                                                                     |
|                                                           |                                                                                                                                                                                |                                                                                              |                                                                                     |
| 3                                                         | Royalties or licenses                                                                                                                                                          | ___ None                                                                                     |                                                                                     |
|                                                           |                                                                                                                                                                                |                                                                                              |                                                                                     |
|                                                           |                                                                                                                                                                                |                                                                                              |                                                                                     |

|    |                                                                                                              |                                                                        |                             |
|----|--------------------------------------------------------------------------------------------------------------|------------------------------------------------------------------------|-----------------------------|
| 4  | Consulting fees                                                                                              | <input type="checkbox"/> None                                          |                             |
|    |                                                                                                              |                                                                        |                             |
|    |                                                                                                              |                                                                        |                             |
| 5  | Payment or honoraria for lectures, presentations, speakers bureaus, manuscript writing or educational events | <input type="checkbox"/> None                                          |                             |
|    |                                                                                                              |                                                                        |                             |
|    |                                                                                                              |                                                                        |                             |
| 6  | Payment for expert testimony                                                                                 | <input type="checkbox"/> None                                          |                             |
|    |                                                                                                              |                                                                        |                             |
|    |                                                                                                              |                                                                        |                             |
| 7  | Support for attending meetings and/or travel                                                                 | <input type="checkbox"/> None                                          |                             |
|    |                                                                                                              |                                                                        |                             |
|    |                                                                                                              |                                                                        |                             |
| 8  | Patents planned, issued or pending                                                                           | <input type="checkbox"/> None                                          |                             |
|    |                                                                                                              |                                                                        |                             |
|    |                                                                                                              |                                                                        |                             |
| 9  | Participation on a Data Safety Monitoring Board or Advisory Board                                            | <input type="checkbox"/> None                                          |                             |
|    |                                                                                                              |                                                                        |                             |
|    |                                                                                                              |                                                                        |                             |
| 10 | Leadership or fiduciary role in other board, society, committee or advocacy group, paid or unpaid            | <input type="checkbox"/> None                                          |                             |
|    |                                                                                                              |                                                                        |                             |
|    |                                                                                                              |                                                                        |                             |
| 11 | Stock or stock options                                                                                       | <input type="checkbox"/> None<br><input checked="" type="checkbox"/> X | a formal employee of Gilead |
|    |                                                                                                              |                                                                        |                             |
|    |                                                                                                              |                                                                        |                             |
| 12 | Receipt of equipment, materials, drugs, medical writing, gifts or other services                             | <input type="checkbox"/> None                                          |                             |
|    |                                                                                                              |                                                                        |                             |
|    |                                                                                                              |                                                                        |                             |
| 13 | Other financial or non-financial interests                                                                   | <input type="checkbox"/> None                                          |                             |
|    |                                                                                                              |                                                                        |                             |
|    |                                                                                                              |                                                                        |                             |

Please place an "X" next to the following statement to indicate your agreement:

I certify that I have answered every question and have not altered the wording of any of the questions on this form.

## ICMJE DISCLOSURE FORM

Date: 8/17/2021

Your Name: Lauri Diehl

Manuscript Title: Characterization of the Immune Microenvironment in Chronic HBV Infected Liver Biopsies

Manuscript number (if known): \_\_\_\_\_

In the interest of transparency, we ask you to disclose all relationships/activities/interests listed below that are related to the content of your manuscript. "Related" means any relation with for-profit or not-for-profit third parties whose interests may be affected by the content of the manuscript. Disclosure represents a commitment to transparency and does not necessarily indicate a bias. If you are in doubt about whether to list a relationship/activity/interest, it is preferable that you do so.

The following questions apply to the author's relationships/activities/interests as they relate to the current manuscript only.

The author's relationships/activities/interests should be defined broadly. For example, if your manuscript pertains to the epidemiology of hypertension, you should declare all relationships with manufacturers of antihypertensive medication, even if that medication is not mentioned in the manuscript.

In item #1 below, report all support for the work reported in this manuscript without time limit. For all other items, the time frame for disclosure is the past 36 months.

|                                                           |                                                                                                                                                                                | Name all entities with whom you have this relationship or indicate none (add rows as needed) | Specifications/Comments (e.g., if payments were made to you or to your institution)                   |
|-----------------------------------------------------------|--------------------------------------------------------------------------------------------------------------------------------------------------------------------------------|----------------------------------------------------------------------------------------------|-------------------------------------------------------------------------------------------------------|
| <b>Time frame: Since the initial planning of the work</b> |                                                                                                                                                                                |                                                                                              |                                                                                                       |
| 1                                                         | All support for the present manuscript (e.g., funding, provision of study materials, medical writing, article processing charges, etc.)<br><b>No time limit for this item.</b> | <input type="checkbox"/> None                                                                | I am a current employee of Gilead Sciences Inc. The research was funded whole by Gilead Sciences Inc. |
|                                                           |                                                                                                                                                                                | Gilead Sciences Inc                                                                          |                                                                                                       |
|                                                           |                                                                                                                                                                                |                                                                                              |                                                                                                       |
|                                                           |                                                                                                                                                                                |                                                                                              |                                                                                                       |
|                                                           |                                                                                                                                                                                |                                                                                              |                                                                                                       |
|                                                           |                                                                                                                                                                                |                                                                                              |                                                                                                       |
| <b>Time frame: past 36 months</b>                         |                                                                                                                                                                                |                                                                                              |                                                                                                       |
| 2                                                         | Grants or contracts from any entity (if not indicated in item #1 above).                                                                                                       | <input checked="" type="checkbox"/> None                                                     |                                                                                                       |
|                                                           |                                                                                                                                                                                |                                                                                              |                                                                                                       |
| 3                                                         | Royalties or licenses                                                                                                                                                          | <input checked="" type="checkbox"/> None                                                     |                                                                                                       |
|                                                           |                                                                                                                                                                                |                                                                                              |                                                                                                       |
|                                                           |                                                                                                                                                                                |                                                                                              |                                                                                                       |

|    |                                                                                                              |                                                      |                                                                                              |
|----|--------------------------------------------------------------------------------------------------------------|------------------------------------------------------|----------------------------------------------------------------------------------------------|
| 4  | Consulting fees                                                                                              | <input checked="" type="checkbox"/> None             |                                                                                              |
|    |                                                                                                              |                                                      |                                                                                              |
|    |                                                                                                              |                                                      |                                                                                              |
| 5  | Payment or honoraria for lectures, presentations, speakers bureaus, manuscript writing or educational events | <input checked="" type="checkbox"/> None             |                                                                                              |
|    |                                                                                                              |                                                      |                                                                                              |
|    |                                                                                                              |                                                      |                                                                                              |
| 6  | Payment for expert testimony                                                                                 | <input checked="" type="checkbox"/> None             |                                                                                              |
|    |                                                                                                              |                                                      |                                                                                              |
|    |                                                                                                              |                                                      |                                                                                              |
| 7  | Support for attending meetings and/or travel                                                                 | <input type="checkbox"/> None                        | I have presented this work at EASL 2021 and my attendance was funded by Gilead Sciences Inc. |
|    |                                                                                                              | Gilead Sciences Inc                                  |                                                                                              |
|    |                                                                                                              |                                                      |                                                                                              |
| 8  | Patents planned, issued or pending                                                                           | <input checked="" type="checkbox"/> None             |                                                                                              |
|    |                                                                                                              |                                                      |                                                                                              |
|    |                                                                                                              |                                                      |                                                                                              |
| 9  | Participation on a Data Safety Monitoring Board or Advisory Board                                            | <input checked="" type="checkbox"/> None             |                                                                                              |
|    |                                                                                                              |                                                      |                                                                                              |
|    |                                                                                                              |                                                      |                                                                                              |
| 10 | Leadership or fiduciary role in other board, society, committee or advocacy group, paid or unpaid            | <input checked="" type="checkbox"/> None             |                                                                                              |
|    |                                                                                                              |                                                      |                                                                                              |
|    |                                                                                                              |                                                      |                                                                                              |
| 11 | Stock or stock options                                                                                       | <input type="checkbox"/> None<br>Gilead Sciences Inc | As an employee of Gilead Sciences, I have received and still own Restricted Stock Units      |
|    |                                                                                                              |                                                      |                                                                                              |
|    |                                                                                                              |                                                      |                                                                                              |
| 12 | Receipt of equipment, materials, drugs, medical writing, gifts or other services                             | <input checked="" type="checkbox"/> None             |                                                                                              |
|    |                                                                                                              |                                                      |                                                                                              |
|    |                                                                                                              |                                                      |                                                                                              |
| 13 | Other financial or non-financial interests                                                                   | <input checked="" type="checkbox"/> None             |                                                                                              |
|    |                                                                                                              |                                                      |                                                                                              |
|    |                                                                                                              |                                                      |                                                                                              |

Please place an "X" next to the following statement to indicate your agreement:

I certify that I have answered every question and have not altered the wording of any of the questions on this form.



## ICMJE DISCLOSURE FORM

Date: August 16<sup>th</sup>, 2021

Your Name: Dmytro Kornyejev

Manuscript Title: \_\_\_\_\_

Manuscript number (if known): \_\_\_\_\_

In the interest of transparency, we ask you to disclose all relationships/activities/interests listed below that are related to the content of your manuscript. "Related" means any relation with for-profit or not-for-profit third parties whose interests may be affected by the content of the manuscript. Disclosure represents a commitment to transparency and does not necessarily indicate a bias. If you are in doubt about whether to list a relationship/activity/interest, it is preferable that you do so.

The following questions apply to the author's relationships/activities/interests as they relate to the **current manuscript only**.

The author's relationships/activities/interests should be **defined broadly**. For example, if your manuscript pertains to the epidemiology of hypertension, you should declare all relationships with manufacturers of antihypertensive medication, even if that medication is not mentioned in the manuscript.

In item #1 below, report all support for the work reported in this manuscript without time limit. For all other items, the time frame for disclosure is the past 36 months.

|                                                           |                                                                                                                                                                                | Name all entities with whom you have this relationship or indicate none (add rows as needed) | Specifications/Comments (e.g., if payments were made to you or to your institution) |
|-----------------------------------------------------------|--------------------------------------------------------------------------------------------------------------------------------------------------------------------------------|----------------------------------------------------------------------------------------------|-------------------------------------------------------------------------------------|
| <b>Time frame: Since the initial planning of the work</b> |                                                                                                                                                                                |                                                                                              |                                                                                     |
| 1                                                         | All support for the present manuscript (e.g., funding, provision of study materials, medical writing, article processing charges, etc.)<br><b>No time limit for this item.</b> | <input type="checkbox"/> None                                                                |                                                                                     |
|                                                           |                                                                                                                                                                                | Gilead Sciences Inc.                                                                         |                                                                                     |
|                                                           |                                                                                                                                                                                |                                                                                              |                                                                                     |
|                                                           |                                                                                                                                                                                |                                                                                              |                                                                                     |
|                                                           |                                                                                                                                                                                |                                                                                              |                                                                                     |
|                                                           |                                                                                                                                                                                |                                                                                              |                                                                                     |
|                                                           |                                                                                                                                                                                |                                                                                              |                                                                                     |
| <b>Time frame: past 36 months</b>                         |                                                                                                                                                                                |                                                                                              |                                                                                     |
| 2                                                         | Grants or contracts from any entity (if not indicated in item #1 above).                                                                                                       | <input checked="" type="checkbox"/> None                                                     |                                                                                     |
|                                                           |                                                                                                                                                                                |                                                                                              |                                                                                     |
|                                                           |                                                                                                                                                                                |                                                                                              |                                                                                     |
| 3                                                         | Royalties or licenses                                                                                                                                                          | <input checked="" type="checkbox"/> None                                                     |                                                                                     |
|                                                           |                                                                                                                                                                                |                                                                                              |                                                                                     |
|                                                           |                                                                                                                                                                                |                                                                                              |                                                                                     |

|    |                                                                                                              |                                          |  |
|----|--------------------------------------------------------------------------------------------------------------|------------------------------------------|--|
| 4  | Consulting fees                                                                                              | <input checked="" type="checkbox"/> None |  |
|    |                                                                                                              |                                          |  |
|    |                                                                                                              |                                          |  |
| 5  | Payment or honoraria for lectures, presentations, speakers bureaus, manuscript writing or educational events | <input checked="" type="checkbox"/> None |  |
|    |                                                                                                              |                                          |  |
|    |                                                                                                              |                                          |  |
| 6  | Payment for expert testimony                                                                                 | <input checked="" type="checkbox"/> None |  |
|    |                                                                                                              |                                          |  |
|    |                                                                                                              |                                          |  |
| 7  | Support for attending meetings and/or travel                                                                 | <input type="checkbox"/> None            |  |
|    |                                                                                                              | Gilead Sciences Inc.                     |  |
|    |                                                                                                              |                                          |  |
| 8  | Patents planned, issued or pending                                                                           | <input checked="" type="checkbox"/> None |  |
|    |                                                                                                              |                                          |  |
|    |                                                                                                              |                                          |  |
| 9  | Participation on a Data Safety Monitoring Board or Advisory Board                                            | <input checked="" type="checkbox"/> None |  |
|    |                                                                                                              |                                          |  |
|    |                                                                                                              |                                          |  |
| 10 | Leadership or fiduciary role in other board, society, committee or advocacy group, paid or unpaid            | <input checked="" type="checkbox"/> None |  |
|    |                                                                                                              |                                          |  |
|    |                                                                                                              |                                          |  |
| 11 | Stock or stock options                                                                                       | <input type="checkbox"/> None            |  |
|    |                                                                                                              | Gilead Sciences Inc.                     |  |
|    |                                                                                                              |                                          |  |
|    |                                                                                                              |                                          |  |
| 12 | Receipt of equipment, materials, drugs, medical writing, gifts or other services                             | <input type="checkbox"/> None            |  |
|    |                                                                                                              | Gilead Sciences Inc.                     |  |
|    |                                                                                                              |                                          |  |
|    |                                                                                                              |                                          |  |
| 13 | Other financial or non-financial interests                                                                   | <input type="checkbox"/> None            |  |
|    |                                                                                                              | Gilead Sciences Inc.                     |  |
|    |                                                                                                              |                                          |  |
|    |                                                                                                              |                                          |  |

Please place an "X" next to the following statement to indicate your agreement:

I certify that I have answered every question and have not altered the wording of any of the questions on this form.

## ICMJE DISCLOSURE FORM

Date: 8/16/2021  
 Your Name: Becket Feierbach  
 Manuscript Title: Characterization of the Immune Microenvironment in Chronic HBV Infected Liver Biopsies  
 Manuscript number (if known): \_\_\_\_\_

In the interest of transparency, we ask you to disclose all relationships/activities/interests listed below that are related to the content of your manuscript. "Related" means any relation with for-profit or not-for-profit third parties whose interests may be affected by the content of the manuscript. Disclosure represents a commitment to transparency and does not necessarily indicate a bias. If you are in doubt about whether to list a relationship/activity/interest, it is preferable that you do so.

The following questions apply to the author's relationships/activities/interests as they relate to the **current manuscript only**.

The author's relationships/activities/interests should be **defined broadly**. For example, if your manuscript pertains to the epidemiology of hypertension, you should declare all relationships with manufacturers of antihypertensive medication, even if that medication is not mentioned in the manuscript.

In item #1 below, report all support for the work reported in this manuscript without time limit. For all other items, the time frame for disclosure is the past 36 months.

|                                                           |                                                                                                                                                                                | Name all entities with whom you have this relationship or indicate none (add rows as needed) | Specifications/Comments (e.g., if payments were made to you or to your institution)                   |
|-----------------------------------------------------------|--------------------------------------------------------------------------------------------------------------------------------------------------------------------------------|----------------------------------------------------------------------------------------------|-------------------------------------------------------------------------------------------------------|
| <b>Time frame: Since the initial planning of the work</b> |                                                                                                                                                                                |                                                                                              |                                                                                                       |
| 1                                                         | All support for the present manuscript (e.g., funding, provision of study materials, medical writing, article processing charges, etc.)<br><b>No time limit for this item.</b> | <input type="checkbox"/> None                                                                | I am a current employee of Gilead Sciences Inc. The research was funded whole by Gilead Sciences Inc. |
|                                                           |                                                                                                                                                                                | Gilead Sciences Inc                                                                          |                                                                                                       |
|                                                           |                                                                                                                                                                                |                                                                                              |                                                                                                       |
|                                                           |                                                                                                                                                                                |                                                                                              |                                                                                                       |
|                                                           |                                                                                                                                                                                |                                                                                              |                                                                                                       |
|                                                           |                                                                                                                                                                                |                                                                                              |                                                                                                       |
| <b>Time frame: past 36 months</b>                         |                                                                                                                                                                                |                                                                                              |                                                                                                       |
| 2                                                         | Grants or contracts from any entity (if not indicated in item #1 above).                                                                                                       | <input checked="" type="checkbox"/> None                                                     |                                                                                                       |
|                                                           |                                                                                                                                                                                |                                                                                              |                                                                                                       |
| 3                                                         | Royalties or licenses                                                                                                                                                          | <input checked="" type="checkbox"/> None                                                     |                                                                                                       |
|                                                           |                                                                                                                                                                                |                                                                                              |                                                                                                       |
|                                                           |                                                                                                                                                                                |                                                                                              |                                                                                                       |

|    |                                                                                                              |                                                      |                                                                                              |
|----|--------------------------------------------------------------------------------------------------------------|------------------------------------------------------|----------------------------------------------------------------------------------------------|
| 4  | Consulting fees                                                                                              | <input checked="" type="checkbox"/> None             |                                                                                              |
|    |                                                                                                              |                                                      |                                                                                              |
|    |                                                                                                              |                                                      |                                                                                              |
| 5  | Payment or honoraria for lectures, presentations, speakers bureaus, manuscript writing or educational events | <input checked="" type="checkbox"/> None             |                                                                                              |
|    |                                                                                                              |                                                      |                                                                                              |
|    |                                                                                                              |                                                      |                                                                                              |
| 6  | Payment for expert testimony                                                                                 | <input checked="" type="checkbox"/> None             |                                                                                              |
|    |                                                                                                              |                                                      |                                                                                              |
|    |                                                                                                              |                                                      |                                                                                              |
| 7  | Support for attending meetings and/or travel                                                                 | <input type="checkbox"/> None                        | I have presented this work at EASL 2021 and my attendance was funded by Gilead Sciences Inc. |
|    |                                                                                                              | Gilead Sciences Inc                                  |                                                                                              |
|    |                                                                                                              |                                                      |                                                                                              |
| 8  | Patents planned, issued or pending                                                                           | <input checked="" type="checkbox"/> None             |                                                                                              |
|    |                                                                                                              |                                                      |                                                                                              |
|    |                                                                                                              |                                                      |                                                                                              |
| 9  | Participation on a Data Safety Monitoring Board or Advisory Board                                            | <input checked="" type="checkbox"/> None             |                                                                                              |
|    |                                                                                                              |                                                      |                                                                                              |
|    |                                                                                                              |                                                      |                                                                                              |
| 10 | Leadership or fiduciary role in other board, society, committee or advocacy group, paid or unpaid            | <input checked="" type="checkbox"/> None             |                                                                                              |
|    |                                                                                                              |                                                      |                                                                                              |
|    |                                                                                                              |                                                      |                                                                                              |
| 11 | Stock or stock options                                                                                       | <input type="checkbox"/> None<br>Gilead Sciences Inc | As an employee of Gilead Sciences, I have received and still own Restricted Stock Units      |
|    |                                                                                                              |                                                      |                                                                                              |
|    |                                                                                                              |                                                      |                                                                                              |
| 12 | Receipt of equipment, materials, drugs, medical writing, gifts or other services                             | <input checked="" type="checkbox"/> None             |                                                                                              |
|    |                                                                                                              |                                                      |                                                                                              |
|    |                                                                                                              |                                                      |                                                                                              |
| 13 | Other financial or non-financial interests                                                                   | <input checked="" type="checkbox"/> None             |                                                                                              |
|    |                                                                                                              |                                                      |                                                                                              |
|    |                                                                                                              |                                                      |                                                                                              |

Please place an "X" next to the following statement to indicate your agreement:

I certify that I have answered every question and have not altered the wording of any of the questions on this form.

## ICMJE DISCLOSURE FORM

Date: 8/16/2021  
 Your Name: Hongmei Mo  
 Manuscript Title: Characterization of the Immune Microenvironment in Chronic HBV Infected Liver Biopsies  
 Manuscript number (if known): \_\_\_\_\_

In the interest of transparency, we ask you to disclose all relationships/activities/interests listed below that are related to the content of your manuscript. "Related" means any relation with for-profit or not-for-profit third parties whose interests may be affected by the content of the manuscript. Disclosure represents a commitment to transparency and does not necessarily indicate a bias. If you are in doubt about whether to list a relationship/activity/interest, it is preferable that you do so.

The following questions apply to the author's relationships/activities/interests as they relate to the **current manuscript only**.

The author's relationships/activities/interests should be **defined broadly**. For example, if your manuscript pertains to the epidemiology of hypertension, you should declare all relationships with manufacturers of antihypertensive medication, even if that medication is not mentioned in the manuscript.

In item #1 below, report all support for the work reported in this manuscript without time limit. For all other items, the time frame for disclosure is the past 36 months.

|                                                           |                                                                                                                                                                                | Name all entities with whom you have this relationship or indicate none (add rows as needed) | Specifications/Comments (e.g., if payments were made to you or to your institution)                   |
|-----------------------------------------------------------|--------------------------------------------------------------------------------------------------------------------------------------------------------------------------------|----------------------------------------------------------------------------------------------|-------------------------------------------------------------------------------------------------------|
| <b>Time frame: Since the initial planning of the work</b> |                                                                                                                                                                                |                                                                                              |                                                                                                       |
| 1                                                         | All support for the present manuscript (e.g., funding, provision of study materials, medical writing, article processing charges, etc.)<br><b>No time limit for this item.</b> | <input type="checkbox"/> None                                                                | I am a current employee of Gilead Sciences Inc. The research was funded whole by Gilead Sciences Inc. |
|                                                           |                                                                                                                                                                                | Gilead Sciences Inc                                                                          |                                                                                                       |
|                                                           |                                                                                                                                                                                |                                                                                              |                                                                                                       |
|                                                           |                                                                                                                                                                                |                                                                                              |                                                                                                       |
|                                                           |                                                                                                                                                                                |                                                                                              |                                                                                                       |
|                                                           |                                                                                                                                                                                |                                                                                              |                                                                                                       |
| <b>Time frame: past 36 months</b>                         |                                                                                                                                                                                |                                                                                              |                                                                                                       |
| 2                                                         | Grants or contracts from any entity (if not indicated in item #1 above).                                                                                                       | <input checked="" type="checkbox"/> None                                                     |                                                                                                       |
|                                                           |                                                                                                                                                                                |                                                                                              |                                                                                                       |
| 3                                                         | Royalties or licenses                                                                                                                                                          | <input checked="" type="checkbox"/> None                                                     |                                                                                                       |
|                                                           |                                                                                                                                                                                |                                                                                              |                                                                                                       |
|                                                           |                                                                                                                                                                                |                                                                                              |                                                                                                       |

|    |                                                                                                              |                                                      |                                                                                              |
|----|--------------------------------------------------------------------------------------------------------------|------------------------------------------------------|----------------------------------------------------------------------------------------------|
| 4  | Consulting fees                                                                                              | <input checked="" type="checkbox"/> None             |                                                                                              |
|    |                                                                                                              |                                                      |                                                                                              |
|    |                                                                                                              |                                                      |                                                                                              |
| 5  | Payment or honoraria for lectures, presentations, speakers bureaus, manuscript writing or educational events | <input checked="" type="checkbox"/> None             |                                                                                              |
|    |                                                                                                              |                                                      |                                                                                              |
|    |                                                                                                              |                                                      |                                                                                              |
| 6  | Payment for expert testimony                                                                                 | <input checked="" type="checkbox"/> None             |                                                                                              |
|    |                                                                                                              |                                                      |                                                                                              |
|    |                                                                                                              |                                                      |                                                                                              |
| 7  | Support for attending meetings and/or travel                                                                 | <input type="checkbox"/> None                        | I have presented this work at EASL 2021 and my attendance was funded by Gilead Sciences Inc. |
|    |                                                                                                              | Gilead Sciences Inc                                  |                                                                                              |
|    |                                                                                                              |                                                      |                                                                                              |
| 8  | Patents planned, issued or pending                                                                           | <input checked="" type="checkbox"/> None             |                                                                                              |
|    |                                                                                                              |                                                      |                                                                                              |
|    |                                                                                                              |                                                      |                                                                                              |
| 9  | Participation on a Data Safety Monitoring Board or Advisory Board                                            | <input checked="" type="checkbox"/> None             |                                                                                              |
|    |                                                                                                              |                                                      |                                                                                              |
|    |                                                                                                              |                                                      |                                                                                              |
| 10 | Leadership or fiduciary role in other board, society, committee or advocacy group, paid or unpaid            | <input checked="" type="checkbox"/> None             |                                                                                              |
|    |                                                                                                              |                                                      |                                                                                              |
|    |                                                                                                              |                                                      |                                                                                              |
| 11 | Stock or stock options                                                                                       | <input type="checkbox"/> None<br>Gilead Sciences Inc | As an employee of Gilead Sciences, I have received and still own Restricted Stock Units      |
|    |                                                                                                              |                                                      |                                                                                              |
|    |                                                                                                              |                                                      |                                                                                              |
| 12 | Receipt of equipment, materials, drugs, medical writing, gifts or other services                             | <input checked="" type="checkbox"/> None             |                                                                                              |
|    |                                                                                                              |                                                      |                                                                                              |
|    |                                                                                                              |                                                      |                                                                                              |
| 13 | Other financial or non-financial interests                                                                   | <input checked="" type="checkbox"/> None             |                                                                                              |
|    |                                                                                                              |                                                      |                                                                                              |
|    |                                                                                                              |                                                      |                                                                                              |

Please place an "X" next to the following statement to indicate your agreement:

I certify that I have answered every question and have not altered the wording of any of the questions on this form.

## ICMJE DISCLOSURE FORM

Date: 8/16/2021  
 Your Name: Jeff Wallin  
 Manuscript Title: Characterization of the Immune Microenvironment in Chronic HBV Infected Liver Biopsies  
 Manuscript number (if known): \_\_\_\_\_

In the interest of transparency, we ask you to disclose all relationships/activities/interests listed below that are related to the content of your manuscript. "Related" means any relation with for-profit or not-for-profit third parties whose interests may be affected by the content of the manuscript. Disclosure represents a commitment to transparency and does not necessarily indicate a bias. If you are in doubt about whether to list a relationship/activity/interest, it is preferable that you do so.

The following questions apply to the author's relationships/activities/interests as they relate to the **current manuscript only**.

The author's relationships/activities/interests should be **defined broadly**. For example, if your manuscript pertains to the epidemiology of hypertension, you should declare all relationships with manufacturers of antihypertensive medication, even if that medication is not mentioned in the manuscript.

In item #1 below, report all support for the work reported in this manuscript without time limit. For all other items, the time frame for disclosure is the past 36 months.

|                                                           |                                                                                                                                                                                | Name all entities with whom you have this relationship or indicate none (add rows as needed) | Specifications/Comments (e.g., if payments were made to you or to your institution)                   |
|-----------------------------------------------------------|--------------------------------------------------------------------------------------------------------------------------------------------------------------------------------|----------------------------------------------------------------------------------------------|-------------------------------------------------------------------------------------------------------|
| <b>Time frame: Since the initial planning of the work</b> |                                                                                                                                                                                |                                                                                              |                                                                                                       |
| 1                                                         | All support for the present manuscript (e.g., funding, provision of study materials, medical writing, article processing charges, etc.)<br><b>No time limit for this item.</b> | <input type="checkbox"/> None                                                                | I am a current employee of Gilead Sciences Inc. The research was funded whole by Gilead Sciences Inc. |
|                                                           |                                                                                                                                                                                | Gilead Sciences Inc                                                                          |                                                                                                       |
|                                                           |                                                                                                                                                                                |                                                                                              |                                                                                                       |
|                                                           |                                                                                                                                                                                |                                                                                              |                                                                                                       |
|                                                           |                                                                                                                                                                                |                                                                                              |                                                                                                       |
|                                                           |                                                                                                                                                                                |                                                                                              |                                                                                                       |
|                                                           |                                                                                                                                                                                |                                                                                              |                                                                                                       |
| <b>Time frame: past 36 months</b>                         |                                                                                                                                                                                |                                                                                              |                                                                                                       |
| 2                                                         | Grants or contracts from any entity (if not indicated in item #1 above).                                                                                                       | <input checked="" type="checkbox"/> None                                                     |                                                                                                       |
|                                                           |                                                                                                                                                                                |                                                                                              |                                                                                                       |
| 3                                                         | Royalties or licenses                                                                                                                                                          | <input checked="" type="checkbox"/> None                                                     |                                                                                                       |
|                                                           |                                                                                                                                                                                |                                                                                              |                                                                                                       |
|                                                           |                                                                                                                                                                                |                                                                                              |                                                                                                       |

|    |                                                                                                              |                                                      |                                                                                              |
|----|--------------------------------------------------------------------------------------------------------------|------------------------------------------------------|----------------------------------------------------------------------------------------------|
| 4  | Consulting fees                                                                                              | <input checked="" type="checkbox"/> None             |                                                                                              |
|    |                                                                                                              |                                                      |                                                                                              |
|    |                                                                                                              |                                                      |                                                                                              |
| 5  | Payment or honoraria for lectures, presentations, speakers bureaus, manuscript writing or educational events | <input checked="" type="checkbox"/> None             |                                                                                              |
|    |                                                                                                              |                                                      |                                                                                              |
|    |                                                                                                              |                                                      |                                                                                              |
| 6  | Payment for expert testimony                                                                                 | <input checked="" type="checkbox"/> None             |                                                                                              |
|    |                                                                                                              |                                                      |                                                                                              |
|    |                                                                                                              |                                                      |                                                                                              |
| 7  | Support for attending meetings and/or travel                                                                 | <input type="checkbox"/> None                        | I have presented this work at EASL 2021 and my attendance was funded by Gilead Sciences Inc. |
|    |                                                                                                              | Gilead Sciences Inc                                  |                                                                                              |
|    |                                                                                                              |                                                      |                                                                                              |
| 8  | Patents planned, issued or pending                                                                           | <input checked="" type="checkbox"/> None             |                                                                                              |
|    |                                                                                                              |                                                      |                                                                                              |
|    |                                                                                                              |                                                      |                                                                                              |
| 9  | Participation on a Data Safety Monitoring Board or Advisory Board                                            | <input checked="" type="checkbox"/> None             |                                                                                              |
|    |                                                                                                              |                                                      |                                                                                              |
|    |                                                                                                              |                                                      |                                                                                              |
| 10 | Leadership or fiduciary role in other board, society, committee or advocacy group, paid or unpaid            | <input checked="" type="checkbox"/> None             |                                                                                              |
|    |                                                                                                              |                                                      |                                                                                              |
|    |                                                                                                              |                                                      |                                                                                              |
| 11 | Stock or stock options                                                                                       | <input type="checkbox"/> None<br>Gilead Sciences Inc | As an employee of Gilead Sciences, I have received and still own Restricted Stock Units      |
|    |                                                                                                              |                                                      |                                                                                              |
|    |                                                                                                              |                                                      |                                                                                              |
| 12 | Receipt of equipment, materials, drugs, medical writing, gifts or other services                             | <input checked="" type="checkbox"/> None             |                                                                                              |
|    |                                                                                                              |                                                      |                                                                                              |
|    |                                                                                                              |                                                      |                                                                                              |
| 13 | Other financial or non-financial interests                                                                   | <input checked="" type="checkbox"/> None             |                                                                                              |
|    |                                                                                                              |                                                      |                                                                                              |
|    |                                                                                                              |                                                      |                                                                                              |

Please place an "X" next to the following statement to indicate your agreement:

I certify that I have answered every question and have not altered the wording of any of the questions on this form.



## ICMJE DISCLOSURE FORM

Date: 8/16/2021  
 Your Name: Li Li  
 Manuscript Title: Characterization of the Liver Immune Microenvironment in Chronic HBV Infected Patient Liver Biopsies  
 Manuscript number (if known): \_\_\_\_\_

In the interest of transparency, we ask you to disclose all relationships/activities/interests listed below that are related to the content of your manuscript. "Related" means any relation with for-profit or not-for-profit third parties whose interests may be affected by the content of the manuscript. Disclosure represents a commitment to transparency and does not necessarily indicate a bias. If you are in doubt about whether to list a relationship/activity/interest, it is preferable that you do so.

The following questions apply to the author's relationships/activities/interests as they relate to the current manuscript only.

The author's relationships/activities/interests should be defined broadly. For example, if your manuscript pertains to the epidemiology of hypertension, you should declare all relationships with manufacturers of antihypertensive medication, even if that medication is not mentioned in the manuscript.

In item #1 below, report all support for the work reported in this manuscript without time limit. For all other items, the time frame for disclosure is the past 36 months.

|                                                           |                                                                                                                                                                                | Name all entities with whom you have this relationship or indicate none (add rows as needed) | Specifications/Comments (e.g., if payments were made to you or to your institution) |
|-----------------------------------------------------------|--------------------------------------------------------------------------------------------------------------------------------------------------------------------------------|----------------------------------------------------------------------------------------------|-------------------------------------------------------------------------------------|
| <b>Time frame: Since the initial planning of the work</b> |                                                                                                                                                                                |                                                                                              |                                                                                     |
| 1                                                         | All support for the present manuscript (e.g., funding, provision of study materials, medical writing, article processing charges, etc.)<br><b>No time limit for this item.</b> | ___ None                                                                                     |                                                                                     |
|                                                           |                                                                                                                                                                                |                                                                                              |                                                                                     |
|                                                           |                                                                                                                                                                                |                                                                                              |                                                                                     |
|                                                           |                                                                                                                                                                                |                                                                                              |                                                                                     |
|                                                           |                                                                                                                                                                                |                                                                                              |                                                                                     |
| <b>Time frame: past 36 months</b>                         |                                                                                                                                                                                |                                                                                              |                                                                                     |
| 2                                                         | Grants or contracts from any entity (if not indicated in item #1 above).                                                                                                       | ___ None                                                                                     |                                                                                     |
|                                                           |                                                                                                                                                                                |                                                                                              |                                                                                     |
| 3                                                         | Royalties or licenses                                                                                                                                                          | ___ None                                                                                     |                                                                                     |
|                                                           |                                                                                                                                                                                |                                                                                              |                                                                                     |

|    |                                                                                                              |           |  |
|----|--------------------------------------------------------------------------------------------------------------|-----------|--|
| 4  | Consulting fees                                                                                              | ____ None |  |
|    |                                                                                                              |           |  |
|    |                                                                                                              |           |  |
| 5  | Payment or honoraria for lectures, presentations, speakers bureaus, manuscript writing or educational events | ____ None |  |
|    |                                                                                                              |           |  |
|    |                                                                                                              |           |  |
| 6  | Payment for expert testimony                                                                                 | ____ None |  |
|    |                                                                                                              |           |  |
|    |                                                                                                              |           |  |
| 7  | Support for attending meetings and/or travel                                                                 | ____ None |  |
|    |                                                                                                              |           |  |
|    |                                                                                                              |           |  |
| 8  | Patents planned, issued or pending                                                                           | ____ None |  |
|    |                                                                                                              |           |  |
|    |                                                                                                              |           |  |
| 9  | Participation on a Data Safety Monitoring Board or Advisory Board                                            | ____ None |  |
|    |                                                                                                              |           |  |
|    |                                                                                                              |           |  |
| 10 | Leadership or fiduciary role in other board, society, committee or advocacy group, paid or unpaid            | ____ None |  |
|    |                                                                                                              |           |  |
|    |                                                                                                              |           |  |
| 11 | Stock or stock options                                                                                       | ____ None |  |
|    |                                                                                                              |           |  |
|    |                                                                                                              |           |  |
| 12 | Receipt of equipment, materials, drugs, medical writing, gifts or other services                             | ____ None |  |
|    |                                                                                                              |           |  |
|    |                                                                                                              |           |  |
| 13 | Other financial or non-financial interests                                                                   | ____ None |  |
|    |                                                                                                              |           |  |
|    |                                                                                                              |           |  |

Please place an "X" next to the following statement to indicate your agreement:

  x   I certify that I have answered every question and have not altered the wording of any of the questions on this form.

## ICMJE DISCLOSURE FORM

Date: August 16, 2021  
 Your Name: Maria Buti  
 Manuscript Title: \_\_\_\_\_  
 Manuscript number (if known): \_\_\_\_\_

In the interest of transparency, we ask you to disclose all relationships/activities/interests listed below that are related to the content of your manuscript. "Related" means any relation with for-profit or not-for-profit third parties whose interests may be affected by the content of the manuscript. Disclosure represents a commitment to transparency and does not necessarily indicate a bias. If you are in doubt about whether to list a relationship/activity/interest, it is preferable that you do so.

The following questions apply to the author's relationships/activities/interests as they relate to the current manuscript only.

The author's relationships/activities/interests should be defined broadly. For example, if your manuscript pertains to the epidemiology of hypertension, you should declare all relationships with manufacturers of antihypertensive medication, even if that medication is not mentioned in the manuscript.

In item #1 below, report all support for the work reported in this manuscript without time limit. For all other items, the time frame for disclosure is the past 36 months.

|                                                           |                                                                                                                                                                                | Name all entities with whom you have this relationship or indicate none (add rows as needed) | Specifications/Comments (e.g., if payments were made to you or to your institution) |
|-----------------------------------------------------------|--------------------------------------------------------------------------------------------------------------------------------------------------------------------------------|----------------------------------------------------------------------------------------------|-------------------------------------------------------------------------------------|
| <b>Time frame: Since the initial planning of the work</b> |                                                                                                                                                                                |                                                                                              |                                                                                     |
| 1                                                         | All support for the present manuscript (e.g., funding, provision of study materials, medical writing, article processing charges, etc.)<br><b>No time limit for this item.</b> | ___ None                                                                                     |                                                                                     |
|                                                           |                                                                                                                                                                                |                                                                                              |                                                                                     |
|                                                           |                                                                                                                                                                                |                                                                                              |                                                                                     |
|                                                           |                                                                                                                                                                                |                                                                                              |                                                                                     |
|                                                           |                                                                                                                                                                                |                                                                                              |                                                                                     |
|                                                           |                                                                                                                                                                                |                                                                                              |                                                                                     |
| <b>Time frame: past 36 months</b>                         |                                                                                                                                                                                |                                                                                              |                                                                                     |
| 2                                                         | Grants or contracts from any entity (if not indicated in item #1 above).                                                                                                       | ___ None                                                                                     |                                                                                     |
|                                                           |                                                                                                                                                                                |                                                                                              |                                                                                     |
|                                                           |                                                                                                                                                                                |                                                                                              |                                                                                     |
| 3                                                         | Royalties or licenses                                                                                                                                                          | ___ None                                                                                     |                                                                                     |
|                                                           |                                                                                                                                                                                |                                                                                              |                                                                                     |
|                                                           |                                                                                                                                                                                |                                                                                              |                                                                                     |

|    |                                                                                                              |                                 |  |
|----|--------------------------------------------------------------------------------------------------------------|---------------------------------|--|
| 4  | Consulting fees                                                                                              | <input type="checkbox"/> Gilead |  |
|    |                                                                                                              | <input type="checkbox"/> Abbvie |  |
|    |                                                                                                              |                                 |  |
| 5  | Payment or honoraria for lectures, presentations, speakers bureaus, manuscript writing or educational events | <input type="checkbox"/> Gilead |  |
|    |                                                                                                              | <input type="checkbox"/> Abbvie |  |
|    |                                                                                                              |                                 |  |
| 6  | Payment for expert testimony                                                                                 | <input type="checkbox"/> None   |  |
|    |                                                                                                              |                                 |  |
|    |                                                                                                              |                                 |  |
| 7  | Support for attending meetings and/or travel                                                                 | <input type="checkbox"/> None   |  |
|    |                                                                                                              |                                 |  |
|    |                                                                                                              |                                 |  |
| 8  | Patents planned, issued or pending                                                                           | <input type="checkbox"/> None   |  |
|    |                                                                                                              |                                 |  |
|    |                                                                                                              |                                 |  |
| 9  | Participation on a Data Safety Monitoring Board or Advisory Board                                            | <input type="checkbox"/> None   |  |
|    |                                                                                                              |                                 |  |
|    |                                                                                                              |                                 |  |
| 10 | Leadership or fiduciary role in other board, society, committee or advocacy group, paid or unpaid            | <input type="checkbox"/> None   |  |
|    |                                                                                                              |                                 |  |
|    |                                                                                                              |                                 |  |
| 11 | Stock or stock options                                                                                       | <input type="checkbox"/> None   |  |
|    |                                                                                                              |                                 |  |
|    |                                                                                                              |                                 |  |
| 12 | Receipt of equipment, materials, drugs, medical writing, gifts or other services                             | <input type="checkbox"/> None   |  |
|    |                                                                                                              |                                 |  |
|    |                                                                                                              |                                 |  |
| 13 | Other financial or non-financial interests                                                                   | <input type="checkbox"/> None   |  |
|    |                                                                                                              |                                 |  |
|    |                                                                                                              |                                 |  |

Please place an "X" next to the following statement to indicate your agreement:

X

I certify that I have answered every question and have not altered the wording of any of the questions on this form.

## ICMJE DISCLOSURE FORM

Date: 8/16/2021  
 Your Name: Nam Bui  
 Manuscript Title: Characterization of the Immune Microenvironment in Chronic HBV Infected Liver Biopsies  
 Manuscript number (if known): \_\_\_\_\_

In the interest of transparency, we ask you to disclose all relationships/activities/interests listed below that are related to the content of your manuscript. "Related" means any relation with for-profit or not-for-profit third parties whose interests may be affected by the content of the manuscript. Disclosure represents a commitment to transparency and does not necessarily indicate a bias. If you are in doubt about whether to list a relationship/activity/interest, it is preferable that you do so.

The following questions apply to the author's relationships/activities/interests as they relate to the current manuscript only.

The author's relationships/activities/interests should be defined broadly. For example, if your manuscript pertains to the epidemiology of hypertension, you should declare all relationships with manufacturers of antihypertensive medication, even if that medication is not mentioned in the manuscript.

In item #1 below, report all support for the work reported in this manuscript without time limit. For all other items, the time frame for disclosure is the past 36 months.

|                                                           |                                                                                                                                                                                | Name all entities with whom you have this relationship or indicate none (add rows as needed) | Specifications/Comments (e.g., if payments were made to you or to your institution)                   |
|-----------------------------------------------------------|--------------------------------------------------------------------------------------------------------------------------------------------------------------------------------|----------------------------------------------------------------------------------------------|-------------------------------------------------------------------------------------------------------|
| <b>Time frame: Since the initial planning of the work</b> |                                                                                                                                                                                |                                                                                              |                                                                                                       |
| 1                                                         | All support for the present manuscript (e.g., funding, provision of study materials, medical writing, article processing charges, etc.)<br><b>No time limit for this item.</b> | <input type="checkbox"/> None                                                                | I am a current employee of Gilead Sciences Inc. The research was funded whole by Gilead Sciences Inc. |
|                                                           |                                                                                                                                                                                | Gilead Sciences Inc                                                                          |                                                                                                       |
|                                                           |                                                                                                                                                                                |                                                                                              |                                                                                                       |
|                                                           |                                                                                                                                                                                |                                                                                              |                                                                                                       |
|                                                           |                                                                                                                                                                                |                                                                                              |                                                                                                       |
|                                                           |                                                                                                                                                                                |                                                                                              |                                                                                                       |
|                                                           |                                                                                                                                                                                |                                                                                              |                                                                                                       |
| <b>Time frame: past 36 months</b>                         |                                                                                                                                                                                |                                                                                              |                                                                                                       |
| 2                                                         | Grants or contracts from any entity (if not indicated in item #1 above).                                                                                                       | <input checked="" type="checkbox"/> None                                                     |                                                                                                       |
|                                                           |                                                                                                                                                                                |                                                                                              |                                                                                                       |
|                                                           |                                                                                                                                                                                |                                                                                              |                                                                                                       |
| 3                                                         | Royalties or licenses                                                                                                                                                          | <input checked="" type="checkbox"/> None                                                     |                                                                                                       |
|                                                           |                                                                                                                                                                                |                                                                                              |                                                                                                       |
|                                                           |                                                                                                                                                                                |                                                                                              |                                                                                                       |

|    |                                                                                                              |                                                      |                                                                                              |
|----|--------------------------------------------------------------------------------------------------------------|------------------------------------------------------|----------------------------------------------------------------------------------------------|
| 4  | Consulting fees                                                                                              | <input checked="" type="checkbox"/> None             |                                                                                              |
|    |                                                                                                              |                                                      |                                                                                              |
|    |                                                                                                              |                                                      |                                                                                              |
| 5  | Payment or honoraria for lectures, presentations, speakers bureaus, manuscript writing or educational events | <input checked="" type="checkbox"/> None             |                                                                                              |
|    |                                                                                                              |                                                      |                                                                                              |
|    |                                                                                                              |                                                      |                                                                                              |
| 6  | Payment for expert testimony                                                                                 | <input checked="" type="checkbox"/> None             |                                                                                              |
|    |                                                                                                              |                                                      |                                                                                              |
|    |                                                                                                              |                                                      |                                                                                              |
| 7  | Support for attending meetings and/or travel                                                                 | <input type="checkbox"/> None                        | I have presented this work at EASL 2021 and my attendance was funded by Gilead Sciences Inc. |
|    |                                                                                                              | Gilead Sciences Inc                                  |                                                                                              |
|    |                                                                                                              |                                                      |                                                                                              |
| 8  | Patents planned, issued or pending                                                                           | <input checked="" type="checkbox"/> None             |                                                                                              |
|    |                                                                                                              |                                                      |                                                                                              |
|    |                                                                                                              |                                                      |                                                                                              |
| 9  | Participation on a Data Safety Monitoring Board or Advisory Board                                            | <input checked="" type="checkbox"/> None             |                                                                                              |
|    |                                                                                                              |                                                      |                                                                                              |
|    |                                                                                                              |                                                      |                                                                                              |
| 10 | Leadership or fiduciary role in other board, society, committee or advocacy group, paid or unpaid            | <input checked="" type="checkbox"/> None             |                                                                                              |
|    |                                                                                                              |                                                      |                                                                                              |
|    |                                                                                                              |                                                      |                                                                                              |
| 11 | Stock or stock options                                                                                       | <input type="checkbox"/> None<br>Gilead Sciences Inc | As an employee of Gilead Sciences, I have received and still own Restricted Stock Units      |
|    |                                                                                                              |                                                      |                                                                                              |
|    |                                                                                                              |                                                      |                                                                                              |
| 12 | Receipt of equipment, materials, drugs, medical writing, gifts or other services                             | <input checked="" type="checkbox"/> None             |                                                                                              |
|    |                                                                                                              |                                                      |                                                                                              |
|    |                                                                                                              |                                                      |                                                                                              |
| 13 | Other financial or non-financial interests                                                                   | <input checked="" type="checkbox"/> None             |                                                                                              |
|    |                                                                                                              |                                                      |                                                                                              |
|    |                                                                                                              |                                                      |                                                                                              |

Please place an "X" next to the following statement to indicate your agreement:

I certify that I have answered every question and have not altered the wording of any of the questions on this form.

## ICMJE DISCLOSURE FORM

**Date:** August 16, 2021

**Your Name:** Neeru Bhardwaj

**Manuscript Title:** Targeted Long-Read Sequencing Reveals Clonally Expanded HBV-Associated Chromosomal Translocations in CHB Patients

**Manuscript number (if known):** \_\_\_\_\_

In the interest of transparency, we ask you to disclose all relationships/activities/interests listed below that are related to the content of your manuscript. "Related" means any relation with for-profit or not-for-profit third parties whose interests may be affected by the content of the manuscript. Disclosure represents a commitment to transparency and does not necessarily indicate a bias. If you are in doubt about whether to list a relationship/activity/interest, it is preferable that you do so.

The following questions apply to the author's relationships/activities/interests as they relate to the current manuscript only.

The author's relationships/activities/interests should be defined broadly. For example, if your manuscript pertains to the epidemiology of hypertension, you should declare all relationships with manufacturers of antihypertensive medication, even if that medication is not mentioned in the manuscript.

In item #1 below, report all support for the work reported in this manuscript without time limit. For all other items, the time frame for disclosure is the past 36 months.

|                                                           |                                                                                                                                                                                | Name all entities with whom you have this relationship or indicate none (add rows as needed) | Specifications/Comments (e.g., if payments were made to you or to your institution) |
|-----------------------------------------------------------|--------------------------------------------------------------------------------------------------------------------------------------------------------------------------------|----------------------------------------------------------------------------------------------|-------------------------------------------------------------------------------------|
| <b>Time frame: Since the initial planning of the work</b> |                                                                                                                                                                                |                                                                                              |                                                                                     |
| 1                                                         | All support for the present manuscript (e.g., funding, provision of study materials, medical writing, article processing charges, etc.)<br><b>No time limit for this item.</b> | ___ None                                                                                     | Was previously employed at Gilead (2015-2018)                                       |
|                                                           |                                                                                                                                                                                |                                                                                              |                                                                                     |
|                                                           |                                                                                                                                                                                |                                                                                              |                                                                                     |
|                                                           |                                                                                                                                                                                |                                                                                              |                                                                                     |
|                                                           |                                                                                                                                                                                |                                                                                              |                                                                                     |
|                                                           |                                                                                                                                                                                |                                                                                              |                                                                                     |
| <b>Time frame: past 36 months</b>                         |                                                                                                                                                                                |                                                                                              |                                                                                     |
| 2                                                         | Grants or contracts from any entity (if not indicated in item #1 above).                                                                                                       | __X__ None                                                                                   |                                                                                     |
|                                                           |                                                                                                                                                                                |                                                                                              |                                                                                     |
|                                                           |                                                                                                                                                                                |                                                                                              |                                                                                     |
| 3                                                         | Royalties or licenses                                                                                                                                                          | __X__ None                                                                                   |                                                                                     |
|                                                           |                                                                                                                                                                                |                                                                                              |                                                                                     |

|    |                                                                                                              |                                          |                                                    |
|----|--------------------------------------------------------------------------------------------------------------|------------------------------------------|----------------------------------------------------|
|    |                                                                                                              |                                          |                                                    |
| 4  | Consulting fees                                                                                              | <input checked="" type="checkbox"/> None |                                                    |
|    |                                                                                                              |                                          |                                                    |
|    |                                                                                                              |                                          |                                                    |
| 5  | Payment or honoraria for lectures, presentations, speakers bureaus, manuscript writing or educational events | <input checked="" type="checkbox"/> None |                                                    |
|    |                                                                                                              |                                          |                                                    |
|    |                                                                                                              |                                          |                                                    |
| 6  | Payment for expert testimony                                                                                 | <input checked="" type="checkbox"/> None |                                                    |
|    |                                                                                                              |                                          |                                                    |
|    |                                                                                                              |                                          |                                                    |
| 7  | Support for attending meetings and/or travel                                                                 | <input checked="" type="checkbox"/> None |                                                    |
|    |                                                                                                              |                                          |                                                    |
|    |                                                                                                              |                                          |                                                    |
| 8  | Patents planned, issued or pending                                                                           | <input checked="" type="checkbox"/> None |                                                    |
|    |                                                                                                              |                                          |                                                    |
|    |                                                                                                              |                                          |                                                    |
| 9  | Participation on a Data Safety Monitoring Board or Advisory Board                                            | <input checked="" type="checkbox"/> None |                                                    |
|    |                                                                                                              |                                          |                                                    |
|    |                                                                                                              |                                          |                                                    |
| 10 | Leadership or fiduciary role in other board, society, committee or advocacy group, paid or unpaid            | <input checked="" type="checkbox"/> None |                                                    |
|    |                                                                                                              |                                          |                                                    |
|    |                                                                                                              |                                          |                                                    |
| 11 | Stock or stock options                                                                                       | <input type="checkbox"/> None            | Received company stock while an employee at Gilead |
|    |                                                                                                              |                                          |                                                    |
|    |                                                                                                              |                                          |                                                    |
| 12 | Receipt of equipment, materials, drugs, medical writing, gifts or other services                             | <input checked="" type="checkbox"/> None |                                                    |
|    |                                                                                                              |                                          |                                                    |
|    |                                                                                                              |                                          |                                                    |
| 13 | Other financial or non-financial interests                                                                   | <input checked="" type="checkbox"/> None |                                                    |
|    |                                                                                                              |                                          |                                                    |
|    |                                                                                                              |                                          |                                                    |

Please place an "X" next to the following statement to indicate your agreement:

I certify that I have answered every question and have not altered the wording of any of the questions on this form.



## ICMJE DISCLOSURE FORM

Date: 8/17/2021  
 Your Name: Ricardo Ramirez  
 Manuscript Title: Characterization of the Immune Microenvironment in Chronic HBV Infected Liver Biopsies  
 Manuscript number (if known): \_\_\_\_\_

In the interest of transparency, we ask you to disclose all relationships/activities/interests listed below that are related to the content of your manuscript. "Related" means any relation with for-profit or not-for-profit third parties whose interests may be affected by the content of the manuscript. Disclosure represents a commitment to transparency and does not necessarily indicate a bias. If you are in doubt about whether to list a relationship/activity/interest, it is preferable that you do so.

The following questions apply to the author's relationships/activities/interests as they relate to the current manuscript only.

The author's relationships/activities/interests should be defined broadly. For example, if your manuscript pertains to the epidemiology of hypertension, you should declare all relationships with manufacturers of antihypertensive medication, even if that medication is not mentioned in the manuscript.

In item #1 below, report all support for the work reported in this manuscript without time limit. For all other items, the time frame for disclosure is the past 36 months.

|                                                           |                                                                                                                                                                                | Name all entities with whom you have this relationship or indicate none (add rows as needed) | Specifications/Comments (e.g., if payments were made to you or to your institution)                   |
|-----------------------------------------------------------|--------------------------------------------------------------------------------------------------------------------------------------------------------------------------------|----------------------------------------------------------------------------------------------|-------------------------------------------------------------------------------------------------------|
| <b>Time frame: Since the initial planning of the work</b> |                                                                                                                                                                                |                                                                                              |                                                                                                       |
| 1                                                         | All support for the present manuscript (e.g., funding, provision of study materials, medical writing, article processing charges, etc.)<br><b>No time limit for this item.</b> | <input type="checkbox"/> None                                                                | I am a current employee of Gilead Sciences Inc. The research was funded whole by Gilead Sciences Inc. |
|                                                           |                                                                                                                                                                                | Gilead Sciences Inc                                                                          |                                                                                                       |
|                                                           |                                                                                                                                                                                |                                                                                              |                                                                                                       |
|                                                           |                                                                                                                                                                                |                                                                                              |                                                                                                       |
|                                                           |                                                                                                                                                                                |                                                                                              |                                                                                                       |
|                                                           |                                                                                                                                                                                |                                                                                              |                                                                                                       |
| <b>Time frame: past 36 months</b>                         |                                                                                                                                                                                |                                                                                              |                                                                                                       |
| 2                                                         | Grants or contracts from any entity (if not indicated in item #1 above).                                                                                                       | <input checked="" type="checkbox"/> None                                                     |                                                                                                       |
|                                                           |                                                                                                                                                                                |                                                                                              |                                                                                                       |
| 3                                                         | Royalties or licenses                                                                                                                                                          | <input checked="" type="checkbox"/> None                                                     |                                                                                                       |
|                                                           |                                                                                                                                                                                |                                                                                              |                                                                                                       |
|                                                           |                                                                                                                                                                                |                                                                                              |                                                                                                       |

|    |                                                                                                              |                                                      |                                                                                              |
|----|--------------------------------------------------------------------------------------------------------------|------------------------------------------------------|----------------------------------------------------------------------------------------------|
| 4  | Consulting fees                                                                                              | <input checked="" type="checkbox"/> None             |                                                                                              |
|    |                                                                                                              |                                                      |                                                                                              |
|    |                                                                                                              |                                                      |                                                                                              |
| 5  | Payment or honoraria for lectures, presentations, speakers bureaus, manuscript writing or educational events | <input checked="" type="checkbox"/> None             |                                                                                              |
|    |                                                                                                              |                                                      |                                                                                              |
|    |                                                                                                              |                                                      |                                                                                              |
| 6  | Payment for expert testimony                                                                                 | <input checked="" type="checkbox"/> None             |                                                                                              |
|    |                                                                                                              |                                                      |                                                                                              |
|    |                                                                                                              |                                                      |                                                                                              |
| 7  | Support for attending meetings and/or travel                                                                 | <input type="checkbox"/> None                        | I have presented this work at EASL 2021 and my attendance was funded by Gilead Sciences Inc. |
|    |                                                                                                              | Gilead Sciences Inc                                  |                                                                                              |
|    |                                                                                                              |                                                      |                                                                                              |
| 8  | Patents planned, issued or pending                                                                           | <input checked="" type="checkbox"/> None             |                                                                                              |
|    |                                                                                                              |                                                      |                                                                                              |
|    |                                                                                                              |                                                      |                                                                                              |
| 9  | Participation on a Data Safety Monitoring Board or Advisory Board                                            | <input checked="" type="checkbox"/> None             |                                                                                              |
|    |                                                                                                              |                                                      |                                                                                              |
|    |                                                                                                              |                                                      |                                                                                              |
| 10 | Leadership or fiduciary role in other board, society, committee or advocacy group, paid or unpaid            | <input checked="" type="checkbox"/> None             |                                                                                              |
|    |                                                                                                              |                                                      |                                                                                              |
|    |                                                                                                              |                                                      |                                                                                              |
| 11 | Stock or stock options                                                                                       | <input type="checkbox"/> None<br>Gilead Sciences Inc | As an employee of Gilead Sciences, I have received and still own Restricted Stock Units      |
|    |                                                                                                              |                                                      |                                                                                              |
|    |                                                                                                              |                                                      |                                                                                              |
| 12 | Receipt of equipment, materials, drugs, medical writing, gifts or other services                             | <input checked="" type="checkbox"/> None             |                                                                                              |
|    |                                                                                                              |                                                      |                                                                                              |
|    |                                                                                                              |                                                      |                                                                                              |
| 13 | Other financial or non-financial interests                                                                   | <input checked="" type="checkbox"/> None             |                                                                                              |
|    |                                                                                                              |                                                      |                                                                                              |
|    |                                                                                                              |                                                      |                                                                                              |

Please place an "X" next to the following statement to indicate your agreement:

I certify that I have answered every question and have not altered the wording of any of the questions on this form.

## ICMJE DISCLOSURE FORM

Date: Aug 15, 2021

Your Name: Sam Kim

Manuscript Title: Characterization of the Liver Immune Microenvironment in Chronic HBV Infected Patient Liver Biopsies

Manuscript number (if known): \_\_\_\_\_

In the interest of transparency, we ask you to disclose all relationships/activities/interests listed below that are related to the content of your manuscript. "Related" means any relation with for-profit or not-for-profit third parties whose interests may be affected by the content of the manuscript. Disclosure represents a commitment to transparency and does not necessarily indicate a bias. If you are in doubt about whether to list a relationship/activity/interest, it is preferable that you do so.

The following questions apply to the author's relationships/activities/interests as they relate to the **current manuscript only**.

The author's relationships/activities/interests should be **defined broadly**. For example, if your manuscript pertains to the epidemiology of hypertension, you should declare all relationships with manufacturers of antihypertensive medication, even if that medication is not mentioned in the manuscript.

In item #1 below, report all support for the work reported in this manuscript without time limit. For all other items, the time frame for disclosure is the past 36 months.

|                                                           |                                                                                                                                                                                | Name all entities with whom you have this relationship or indicate none (add rows as needed) | Specifications/Comments (e.g., if payments were made to you or to your institution) |
|-----------------------------------------------------------|--------------------------------------------------------------------------------------------------------------------------------------------------------------------------------|----------------------------------------------------------------------------------------------|-------------------------------------------------------------------------------------|
| <b>Time frame: Since the initial planning of the work</b> |                                                                                                                                                                                |                                                                                              |                                                                                     |
| 1                                                         | All support for the present manuscript (e.g., funding, provision of study materials, medical writing, article processing charges, etc.)<br><b>No time limit for this item.</b> | _X_ None                                                                                     |                                                                                     |
|                                                           |                                                                                                                                                                                |                                                                                              |                                                                                     |
|                                                           |                                                                                                                                                                                |                                                                                              |                                                                                     |
|                                                           |                                                                                                                                                                                |                                                                                              |                                                                                     |
|                                                           |                                                                                                                                                                                |                                                                                              |                                                                                     |
|                                                           |                                                                                                                                                                                |                                                                                              |                                                                                     |
| <b>Time frame: past 36 months</b>                         |                                                                                                                                                                                |                                                                                              |                                                                                     |
| 2                                                         | Grants or contracts from any entity (if not indicated in item #1 above).                                                                                                       | _X_ None                                                                                     |                                                                                     |
|                                                           |                                                                                                                                                                                |                                                                                              |                                                                                     |
|                                                           |                                                                                                                                                                                |                                                                                              |                                                                                     |
| 3                                                         | Royalties or licenses                                                                                                                                                          | _X_ None                                                                                     |                                                                                     |
|                                                           |                                                                                                                                                                                |                                                                                              |                                                                                     |

|    |                                                                                                              |                                          |                                                  |
|----|--------------------------------------------------------------------------------------------------------------|------------------------------------------|--------------------------------------------------|
|    |                                                                                                              |                                          |                                                  |
| 4  | Consulting fees                                                                                              | <input checked="" type="checkbox"/> None |                                                  |
|    |                                                                                                              |                                          |                                                  |
|    |                                                                                                              |                                          |                                                  |
| 5  | Payment or honoraria for lectures, presentations, speakers bureaus, manuscript writing or educational events | <input checked="" type="checkbox"/> None |                                                  |
|    |                                                                                                              |                                          |                                                  |
|    |                                                                                                              |                                          |                                                  |
| 6  | Payment for expert testimony                                                                                 | <input checked="" type="checkbox"/> None |                                                  |
|    |                                                                                                              |                                          |                                                  |
|    |                                                                                                              |                                          |                                                  |
| 7  | Support for attending meetings and/or travel                                                                 | <input checked="" type="checkbox"/> None |                                                  |
|    |                                                                                                              |                                          |                                                  |
|    |                                                                                                              |                                          |                                                  |
| 8  | Patents planned, issued or pending                                                                           | <input checked="" type="checkbox"/> None |                                                  |
|    |                                                                                                              |                                          |                                                  |
|    |                                                                                                              |                                          |                                                  |
| 9  | Participation on a Data Safety Monitoring Board or Advisory Board                                            | <input checked="" type="checkbox"/> None |                                                  |
|    |                                                                                                              |                                          |                                                  |
|    |                                                                                                              |                                          |                                                  |
| 10 | Leadership or fiduciary role in other board, society, committee or advocacy group, paid or unpaid            | <input checked="" type="checkbox"/> None |                                                  |
|    |                                                                                                              |                                          |                                                  |
|    |                                                                                                              |                                          |                                                  |
| 11 | Stock or stock options                                                                                       | <input type="checkbox"/> None            |                                                  |
|    |                                                                                                              | Gilead Sciences, Inc.                    | Sam Kim is employed by and owns stock in Gilead. |
|    |                                                                                                              |                                          |                                                  |
| 12 | Receipt of equipment, materials, drugs, medical writing, gifts or other services                             | <input checked="" type="checkbox"/> None |                                                  |
|    |                                                                                                              |                                          |                                                  |
|    |                                                                                                              |                                          |                                                  |
| 13 | Other financial or non-financial interests                                                                   | <input checked="" type="checkbox"/> None |                                                  |
|    |                                                                                                              |                                          |                                                  |
|    |                                                                                                              |                                          |                                                  |

Please place an "X" next to the following statement to indicate your agreement:

I certify that I have answered every question and have not altered the wording of any of the questions on this form.

## ICMJE DISCLOSURE FORM

Date: 16<sup>th</sup> August 2021

Your Name: Simon Fletcher

Manuscript Title: [Characterization of the Liver Immune Microenvironment in Chronic HBV Infected Patient Liver Biopsies](#)

Manuscript number (if known):

In the interest of transparency, we ask you to disclose all relationships/activities/interests listed below that are related to the content of your manuscript. “Related” means any relation with for-profit or not-for-profit third parties whose interests may be affected by the content of the manuscript. Disclosure represents a commitment to transparency and does not necessarily indicate a bias. If you are in doubt about whether to list a relationship/activity/interest, it is preferable that you do so.

The following questions apply to the author’s relationships/activities/interests as they relate to the current manuscript only.

The author’s relationships/activities/interests should be defined broadly. For example, if your manuscript pertains to the epidemiology of hypertension, you should declare all relationships with manufacturers of antihypertensive medication, even if that medication is not mentioned in the manuscript.

In item #1 below, report all support for the work reported in this manuscript without time limit. For all other items, the time frame for disclosure is the past 36 months.

|                                                           |                                                                                                                                                                                | Name all entities with whom you have this relationship or indicate none (add rows as needed) | Specifications/Comments (e.g., if payments were made to you or to your institution) |
|-----------------------------------------------------------|--------------------------------------------------------------------------------------------------------------------------------------------------------------------------------|----------------------------------------------------------------------------------------------|-------------------------------------------------------------------------------------|
| <b>Time frame: Since the initial planning of the work</b> |                                                                                                                                                                                |                                                                                              |                                                                                     |
| 1                                                         | All support for the present manuscript (e.g., funding, provision of study materials, medical writing, article processing charges, etc.)<br><b>No time limit for this item.</b> | ___ None                                                                                     |                                                                                     |
|                                                           |                                                                                                                                                                                | <a href="#">Gilead Sciences, Inc.</a>                                                        | <a href="#">Gilead provided financial support for the study.</a>                    |
|                                                           |                                                                                                                                                                                |                                                                                              |                                                                                     |
|                                                           |                                                                                                                                                                                |                                                                                              |                                                                                     |
|                                                           |                                                                                                                                                                                |                                                                                              |                                                                                     |
|                                                           |                                                                                                                                                                                |                                                                                              |                                                                                     |
| <b>Time frame: past 36 months</b>                         |                                                                                                                                                                                |                                                                                              |                                                                                     |
| 2                                                         | Grants or contracts from any entity (if not indicated in item #1 above).                                                                                                       | _X_ None                                                                                     |                                                                                     |
|                                                           |                                                                                                                                                                                |                                                                                              |                                                                                     |
| 3                                                         | Royalties or licenses                                                                                                                                                          | _X_ None                                                                                     |                                                                                     |
|                                                           |                                                                                                                                                                                |                                                                                              |                                                                                     |

|    |                                                                                                              |                                          |                                                                    |
|----|--------------------------------------------------------------------------------------------------------------|------------------------------------------|--------------------------------------------------------------------|
| 4  | Consulting fees                                                                                              | <input checked="" type="checkbox"/> None |                                                                    |
| 5  | Payment or honoraria for lectures, presentations, speakers bureaus, manuscript writing or educational events | <input checked="" type="checkbox"/> None |                                                                    |
| 6  | Payment for expert testimony                                                                                 | <input checked="" type="checkbox"/> None |                                                                    |
| 7  | Support for attending meetings and/or travel                                                                 | <input checked="" type="checkbox"/> None |                                                                    |
| 8  | Patents planned, issued or pending                                                                           | <input checked="" type="checkbox"/> None |                                                                    |
| 9  | Participation on a Data Safety Monitoring Board or Advisory Board                                            | <input checked="" type="checkbox"/> None |                                                                    |
| 10 | Leadership or fiduciary role in other board, society, committee or advocacy group, paid or unpaid            | <input checked="" type="checkbox"/> None |                                                                    |
| 11 | Stock or stock options                                                                                       | <input type="checkbox"/> None            |                                                                    |
|    |                                                                                                              | <a href="#">Gilead Sciences, Inc.</a>    | <a href="#">I have stock and stock options in Gilead Sciences.</a> |
| 12 | Receipt of equipment, materials, drugs, medical writing, gifts or other services                             | <input checked="" type="checkbox"/> None |                                                                    |
| 13 | Other financial or non-financial interests                                                                   | <input type="checkbox"/> None            |                                                                    |
|    |                                                                                                              | <a href="#">Gilead Sciences, Inc.</a>    | <a href="#">I am an employee of Gilead Sciences.</a>               |

Please place an "X" next to the following statement to indicate your agreement:

I certify that I have answered every question and have not altered the wording of any of the questions on this form.

## ICMJE DISCLOSURE FORM

Date: 8/18/2021  
 Your Name: Scott Turner  
 Manuscript Title: Characterization of the Immune Microenvironment in Chronic HBV Infected Liver Biopsies  
 Manuscript number (if known): \_\_\_\_\_

In the interest of transparency, we ask you to disclose all relationships/activities/interests listed below that are related to the content of your manuscript. "Related" means any relation with for-profit or not-for-profit third parties whose interests may be affected by the content of the manuscript. Disclosure represents a commitment to transparency and does not necessarily indicate a bias. If you are in doubt about whether to list a relationship/activity/interest, it is preferable that you do so.

The following questions apply to the author's relationships/activities/interests as they relate to the **current manuscript only**.

The author's relationships/activities/interests should be **defined broadly**. For example, if your manuscript pertains to the epidemiology of hypertension, you should declare all relationships with manufacturers of antihypertensive medication, even if that medication is not mentioned in the manuscript.

In item #1 below, report all support for the work reported in this manuscript without time limit. For all other items, the time frame for disclosure is the past 36 months.

|                                                           |                                                                                                                                                                                | Name all entities with whom you have this relationship or indicate none (add rows as needed) | Specifications/Comments (e.g., if payments were made to you or to your institution)                   |
|-----------------------------------------------------------|--------------------------------------------------------------------------------------------------------------------------------------------------------------------------------|----------------------------------------------------------------------------------------------|-------------------------------------------------------------------------------------------------------|
| <b>Time frame: Since the initial planning of the work</b> |                                                                                                                                                                                |                                                                                              |                                                                                                       |
| 1                                                         | All support for the present manuscript (e.g., funding, provision of study materials, medical writing, article processing charges, etc.)<br><b>No time limit for this item.</b> | ___ None<br>Gilead Sciences Inc                                                              | I am a current employee of Gilead Sciences Inc. The research was funded whole by Gilead Sciences Inc. |
|                                                           |                                                                                                                                                                                |                                                                                              |                                                                                                       |
|                                                           |                                                                                                                                                                                |                                                                                              |                                                                                                       |
|                                                           |                                                                                                                                                                                |                                                                                              |                                                                                                       |
|                                                           |                                                                                                                                                                                |                                                                                              |                                                                                                       |
|                                                           |                                                                                                                                                                                |                                                                                              |                                                                                                       |
|                                                           |                                                                                                                                                                                |                                                                                              |                                                                                                       |
| <b>Time frame: past 36 months</b>                         |                                                                                                                                                                                |                                                                                              |                                                                                                       |
| 2                                                         | Grants or contracts from any entity (if not indicated in item #1 above).                                                                                                       | _X___ None                                                                                   |                                                                                                       |
|                                                           |                                                                                                                                                                                |                                                                                              |                                                                                                       |
| 3                                                         | Royalties or licenses                                                                                                                                                          | _X___ None                                                                                   |                                                                                                       |
|                                                           |                                                                                                                                                                                |                                                                                              |                                                                                                       |
|                                                           |                                                                                                                                                                                |                                                                                              |                                                                                                       |

|    |                                                                                                              |                                                      |                                                                                              |
|----|--------------------------------------------------------------------------------------------------------------|------------------------------------------------------|----------------------------------------------------------------------------------------------|
| 4  | Consulting fees                                                                                              | <input checked="" type="checkbox"/> None             |                                                                                              |
|    |                                                                                                              |                                                      |                                                                                              |
|    |                                                                                                              |                                                      |                                                                                              |
| 5  | Payment or honoraria for lectures, presentations, speakers bureaus, manuscript writing or educational events | <input checked="" type="checkbox"/> None             |                                                                                              |
|    |                                                                                                              |                                                      |                                                                                              |
|    |                                                                                                              |                                                      |                                                                                              |
| 6  | Payment for expert testimony                                                                                 | <input checked="" type="checkbox"/> None             |                                                                                              |
|    |                                                                                                              |                                                      |                                                                                              |
|    |                                                                                                              |                                                      |                                                                                              |
| 7  | Support for attending meetings and/or travel                                                                 | <input type="checkbox"/> None                        | I have presented this work at EASL 2021 and my attendance was funded by Gilead Sciences Inc. |
|    |                                                                                                              | Gilead Sciences Inc                                  |                                                                                              |
|    |                                                                                                              |                                                      |                                                                                              |
| 8  | Patents planned, issued or pending                                                                           | <input checked="" type="checkbox"/> None             |                                                                                              |
|    |                                                                                                              |                                                      |                                                                                              |
|    |                                                                                                              |                                                      |                                                                                              |
| 9  | Participation on a Data Safety Monitoring Board or Advisory Board                                            | <input checked="" type="checkbox"/> None             |                                                                                              |
|    |                                                                                                              |                                                      |                                                                                              |
|    |                                                                                                              |                                                      |                                                                                              |
| 10 | Leadership or fiduciary role in other board, society, committee or advocacy group, paid or unpaid            | <input checked="" type="checkbox"/> None             |                                                                                              |
|    |                                                                                                              |                                                      |                                                                                              |
|    |                                                                                                              |                                                      |                                                                                              |
| 11 | Stock or stock options                                                                                       | <input type="checkbox"/> None<br>Gilead Sciences Inc | As an employee of Gilead Sciences, I have received and still own Restricted Stock Units      |
|    |                                                                                                              |                                                      |                                                                                              |
|    |                                                                                                              |                                                      |                                                                                              |
| 12 | Receipt of equipment, materials, drugs, medical writing, gifts or other services                             | <input checked="" type="checkbox"/> None             |                                                                                              |
|    |                                                                                                              |                                                      |                                                                                              |
|    |                                                                                                              |                                                      |                                                                                              |
| 13 | Other financial or non-financial interests                                                                   | <input checked="" type="checkbox"/> None             |                                                                                              |
|    |                                                                                                              |                                                      |                                                                                              |
|    |                                                                                                              |                                                      |                                                                                              |

Please place an "X" next to the following statement to indicate your agreement:

I certify that I have answered every question and have not altered the wording of any of the questions on this form.



## ICMJE DISCLOSURE FORM

Date: 8/16/2021  
 Your Name: Vithika Suri  
 Manuscript Title: Characterization of the Immune Microenvironment in Chronic HBV Infected Liver Biopsies  
 Manuscript number (if known): \_\_\_\_\_

In the interest of transparency, we ask you to disclose all relationships/activities/interests listed below that are related to the content of your manuscript. "Related" means any relation with for-profit or not-for-profit third parties whose interests may be affected by the content of the manuscript. Disclosure represents a commitment to transparency and does not necessarily indicate a bias. If you are in doubt about whether to list a relationship/activity/interest, it is preferable that you do so.

The following questions apply to the author's relationships/activities/interests as they relate to the **current manuscript only**.

The author's relationships/activities/interests should be **defined broadly**. For example, if your manuscript pertains to the epidemiology of hypertension, you should declare all relationships with manufacturers of antihypertensive medication, even if that medication is not mentioned in the manuscript.

In item #1 below, report all support for the work reported in this manuscript without time limit. For all other items, the time frame for disclosure is the past 36 months.

|                                                           |                                                                                                                                                                                | Name all entities with whom you have this relationship or indicate none (add rows as needed) | Specifications/Comments (e.g., if payments were made to you or to your institution)                   |
|-----------------------------------------------------------|--------------------------------------------------------------------------------------------------------------------------------------------------------------------------------|----------------------------------------------------------------------------------------------|-------------------------------------------------------------------------------------------------------|
| <b>Time frame: Since the initial planning of the work</b> |                                                                                                                                                                                |                                                                                              |                                                                                                       |
| 1                                                         | All support for the present manuscript (e.g., funding, provision of study materials, medical writing, article processing charges, etc.)<br><b>No time limit for this item.</b> | <input type="checkbox"/> None                                                                | I am a current employee of Gilead Sciences Inc. The research was funded whole by Gilead Sciences Inc. |
|                                                           |                                                                                                                                                                                | Gilead Sciences Inc                                                                          |                                                                                                       |
|                                                           |                                                                                                                                                                                |                                                                                              |                                                                                                       |
|                                                           |                                                                                                                                                                                |                                                                                              |                                                                                                       |
|                                                           |                                                                                                                                                                                |                                                                                              |                                                                                                       |
|                                                           |                                                                                                                                                                                |                                                                                              |                                                                                                       |
| <b>Time frame: past 36 months</b>                         |                                                                                                                                                                                |                                                                                              |                                                                                                       |
| 2                                                         | Grants or contracts from any entity (if not indicated in item #1 above).                                                                                                       | <input checked="" type="checkbox"/> None                                                     |                                                                                                       |
|                                                           |                                                                                                                                                                                |                                                                                              |                                                                                                       |
| 3                                                         | Royalties or licenses                                                                                                                                                          | <input checked="" type="checkbox"/> None                                                     |                                                                                                       |
|                                                           |                                                                                                                                                                                |                                                                                              |                                                                                                       |
|                                                           |                                                                                                                                                                                |                                                                                              |                                                                                                       |

|    |                                                                                                              |                                                      |                                                                                              |
|----|--------------------------------------------------------------------------------------------------------------|------------------------------------------------------|----------------------------------------------------------------------------------------------|
| 4  | Consulting fees                                                                                              | <input checked="" type="checkbox"/> None             |                                                                                              |
|    |                                                                                                              |                                                      |                                                                                              |
|    |                                                                                                              |                                                      |                                                                                              |
| 5  | Payment or honoraria for lectures, presentations, speakers bureaus, manuscript writing or educational events | <input checked="" type="checkbox"/> None             |                                                                                              |
|    |                                                                                                              |                                                      |                                                                                              |
|    |                                                                                                              |                                                      |                                                                                              |
| 6  | Payment for expert testimony                                                                                 | <input checked="" type="checkbox"/> None             |                                                                                              |
|    |                                                                                                              |                                                      |                                                                                              |
|    |                                                                                                              |                                                      |                                                                                              |
| 7  | Support for attending meetings and/or travel                                                                 | <input type="checkbox"/> None                        | I have presented this work at EASL 2021 and my attendance was funded by Gilead Sciences Inc. |
|    |                                                                                                              | Gilead Sciences Inc                                  |                                                                                              |
|    |                                                                                                              |                                                      |                                                                                              |
| 8  | Patents planned, issued or pending                                                                           | <input checked="" type="checkbox"/> None             |                                                                                              |
|    |                                                                                                              |                                                      |                                                                                              |
|    |                                                                                                              |                                                      |                                                                                              |
| 9  | Participation on a Data Safety Monitoring Board or Advisory Board                                            | <input checked="" type="checkbox"/> None             |                                                                                              |
|    |                                                                                                              |                                                      |                                                                                              |
|    |                                                                                                              |                                                      |                                                                                              |
| 10 | Leadership or fiduciary role in other board, society, committee or advocacy group, paid or unpaid            | <input checked="" type="checkbox"/> None             |                                                                                              |
|    |                                                                                                              |                                                      |                                                                                              |
|    |                                                                                                              |                                                      |                                                                                              |
| 11 | Stock or stock options                                                                                       | <input type="checkbox"/> None<br>Gilead Sciences Inc | As an employee of Gilead Sciences, I have received and still own Restricted Stock Units      |
|    |                                                                                                              |                                                      |                                                                                              |
|    |                                                                                                              |                                                      |                                                                                              |
| 12 | Receipt of equipment, materials, drugs, medical writing, gifts or other services                             | <input checked="" type="checkbox"/> None             |                                                                                              |
|    |                                                                                                              |                                                      |                                                                                              |
|    |                                                                                                              |                                                      |                                                                                              |
| 13 | Other financial or non-financial interests                                                                   | <input checked="" type="checkbox"/> None             |                                                                                              |
|    |                                                                                                              |                                                      |                                                                                              |
|    |                                                                                                              |                                                      |                                                                                              |

Please place an "X" next to the following statement to indicate your agreement:

I certify that I have answered every question and have not altered the wording of any of the questions on this form.

## ICMJE DISCLOSURE FORM

Date: 8/16/2021  
 Your Name: Nick van Buuren  
 Manuscript Title: Characterization of the Immune Microenvironment in Chronic HBV Infected Liver Biopsies  
 Manuscript number (if known): \_\_\_\_\_

In the interest of transparency, we ask you to disclose all relationships/activities/interests listed below that are related to the content of your manuscript. "Related" means any relation with for-profit or not-for-profit third parties whose interests may be affected by the content of the manuscript. Disclosure represents a commitment to transparency and does not necessarily indicate a bias. If you are in doubt about whether to list a relationship/activity/interest, it is preferable that you do so.

The following questions apply to the author's relationships/activities/interests as they relate to the **current manuscript only**.

The author's relationships/activities/interests should be **defined broadly**. For example, if your manuscript pertains to the epidemiology of hypertension, you should declare all relationships with manufacturers of antihypertensive medication, even if that medication is not mentioned in the manuscript.

In item #1 below, report all support for the work reported in this manuscript without time limit. For all other items, the time frame for disclosure is the past 36 months.

|                                                           |                                                                                                                                                                                | Name all entities with whom you have this relationship or indicate none (add rows as needed) | Specifications/Comments (e.g., if payments were made to you or to your institution)                   |
|-----------------------------------------------------------|--------------------------------------------------------------------------------------------------------------------------------------------------------------------------------|----------------------------------------------------------------------------------------------|-------------------------------------------------------------------------------------------------------|
| <b>Time frame: Since the initial planning of the work</b> |                                                                                                                                                                                |                                                                                              |                                                                                                       |
| 1                                                         | All support for the present manuscript (e.g., funding, provision of study materials, medical writing, article processing charges, etc.)<br><b>No time limit for this item.</b> | <input type="checkbox"/> None                                                                | I am a current employee of Gilead Sciences Inc. The research was funded whole by Gilead Sciences Inc. |
|                                                           |                                                                                                                                                                                | Gilead Sciences Inc                                                                          |                                                                                                       |
|                                                           |                                                                                                                                                                                |                                                                                              |                                                                                                       |
|                                                           |                                                                                                                                                                                |                                                                                              |                                                                                                       |
|                                                           |                                                                                                                                                                                |                                                                                              |                                                                                                       |
|                                                           |                                                                                                                                                                                |                                                                                              |                                                                                                       |
| <b>Time frame: past 36 months</b>                         |                                                                                                                                                                                |                                                                                              |                                                                                                       |
| 2                                                         | Grants or contracts from any entity (if not indicated in item #1 above).                                                                                                       | <input checked="" type="checkbox"/> None                                                     |                                                                                                       |
|                                                           |                                                                                                                                                                                |                                                                                              |                                                                                                       |
| 3                                                         | Royalties or licenses                                                                                                                                                          | <input checked="" type="checkbox"/> None                                                     |                                                                                                       |
|                                                           |                                                                                                                                                                                |                                                                                              |                                                                                                       |
|                                                           |                                                                                                                                                                                |                                                                                              |                                                                                                       |

|    |                                                                                                              |                                                      |                                                                                              |
|----|--------------------------------------------------------------------------------------------------------------|------------------------------------------------------|----------------------------------------------------------------------------------------------|
| 4  | Consulting fees                                                                                              | <input checked="" type="checkbox"/> None             |                                                                                              |
|    |                                                                                                              |                                                      |                                                                                              |
|    |                                                                                                              |                                                      |                                                                                              |
| 5  | Payment or honoraria for lectures, presentations, speakers bureaus, manuscript writing or educational events | <input checked="" type="checkbox"/> None             |                                                                                              |
|    |                                                                                                              |                                                      |                                                                                              |
|    |                                                                                                              |                                                      |                                                                                              |
| 6  | Payment for expert testimony                                                                                 | <input checked="" type="checkbox"/> None             |                                                                                              |
|    |                                                                                                              |                                                      |                                                                                              |
|    |                                                                                                              |                                                      |                                                                                              |
| 7  | Support for attending meetings and/or travel                                                                 | <input type="checkbox"/> None                        | I have presented this work at EASL 2021 and my attendance was funded by Gilead Sciences Inc. |
|    |                                                                                                              | Gilead Sciences Inc                                  |                                                                                              |
|    |                                                                                                              |                                                      |                                                                                              |
| 8  | Patents planned, issued or pending                                                                           | <input checked="" type="checkbox"/> None             |                                                                                              |
|    |                                                                                                              |                                                      |                                                                                              |
|    |                                                                                                              |                                                      |                                                                                              |
| 9  | Participation on a Data Safety Monitoring Board or Advisory Board                                            | <input checked="" type="checkbox"/> None             |                                                                                              |
|    |                                                                                                              |                                                      |                                                                                              |
|    |                                                                                                              |                                                      |                                                                                              |
| 10 | Leadership or fiduciary role in other board, society, committee or advocacy group, paid or unpaid            | <input checked="" type="checkbox"/> None             |                                                                                              |
|    |                                                                                                              |                                                      |                                                                                              |
|    |                                                                                                              |                                                      |                                                                                              |
| 11 | Stock or stock options                                                                                       | <input type="checkbox"/> None<br>Gilead Sciences Inc | As an employee of Gilead Sciences, I have received and still own Restricted Stock Units      |
|    |                                                                                                              |                                                      |                                                                                              |
|    |                                                                                                              |                                                      |                                                                                              |
| 12 | Receipt of equipment, materials, drugs, medical writing, gifts or other services                             | <input checked="" type="checkbox"/> None             |                                                                                              |
|    |                                                                                                              |                                                      |                                                                                              |
|    |                                                                                                              |                                                      |                                                                                              |
| 13 | Other financial or non-financial interests                                                                   | <input checked="" type="checkbox"/> None             |                                                                                              |
|    |                                                                                                              |                                                      |                                                                                              |
|    |                                                                                                              |                                                      |                                                                                              |

Please place an "X" next to the following statement to indicate your agreement:

I certify that I have answered every question and have not altered the wording of any of the questions on this form.

## ICMJE DISCLOSURE FORM

Date: 10/8/2021  
 Your Name: Anuj Gaggar  
 Manuscript Title: Characterization of the Liver Immune Microenvironment in Chronic HBV Infected Patient Liver Biopsies  
 Manuscript number (if known): \_\_\_\_\_

In the interest of transparency, we ask you to disclose all relationships/activities/interests listed below that are related to the content of your manuscript. "Related" means any relation with for-profit or not-for-profit third parties whose interests may be affected by the content of the manuscript. Disclosure represents a commitment to transparency and does not necessarily indicate a bias. If you are in doubt about whether to list a relationship/activity/interest, it is preferable that you do so.

The following questions apply to the author's relationships/activities/interests as they relate to the current manuscript only.

The author's relationships/activities/interests should be defined broadly. For example, if your manuscript pertains to the epidemiology of hypertension, you should declare all relationships with manufacturers of antihypertensive medication, even if that medication is not mentioned in the manuscript.

In item #1 below, report all support for the work reported in this manuscript without time limit. For all other items, the time frame for disclosure is the past 36 months.

|                                                           |                                                                                                                                                                                | Name all entities with whom you have this relationship or indicate none (add rows as needed) | Specifications/Comments (e.g., if payments were made to you or to your institution) |
|-----------------------------------------------------------|--------------------------------------------------------------------------------------------------------------------------------------------------------------------------------|----------------------------------------------------------------------------------------------|-------------------------------------------------------------------------------------|
| <b>Time frame: Since the initial planning of the work</b> |                                                                                                                                                                                |                                                                                              |                                                                                     |
| 1                                                         | All support for the present manuscript (e.g., funding, provision of study materials, medical writing, article processing charges, etc.)<br><b>No time limit for this item.</b> | <input type="checkbox"/> None                                                                |                                                                                     |
|                                                           |                                                                                                                                                                                | Gilead Sciences                                                                              |                                                                                     |
|                                                           |                                                                                                                                                                                |                                                                                              |                                                                                     |
|                                                           |                                                                                                                                                                                |                                                                                              |                                                                                     |
|                                                           |                                                                                                                                                                                |                                                                                              |                                                                                     |
|                                                           |                                                                                                                                                                                |                                                                                              |                                                                                     |
| <b>Time frame: past 36 months</b>                         |                                                                                                                                                                                |                                                                                              |                                                                                     |
| 2                                                         | Grants or contracts from any entity (if not indicated in item #1 above).                                                                                                       | <input checked="" type="checkbox"/> None                                                     |                                                                                     |
|                                                           |                                                                                                                                                                                |                                                                                              |                                                                                     |
| 3                                                         | Royalties or licenses                                                                                                                                                          | <input checked="" type="checkbox"/> None                                                     |                                                                                     |
|                                                           |                                                                                                                                                                                |                                                                                              |                                                                                     |
| 4                                                         | Consulting fees                                                                                                                                                                | <input checked="" type="checkbox"/> None                                                     |                                                                                     |
|                                                           |                                                                                                                                                                                |                                                                                              |                                                                                     |

|    |                                                                                                              |                                                  |  |
|----|--------------------------------------------------------------------------------------------------------------|--------------------------------------------------|--|
|    |                                                                                                              |                                                  |  |
| 5  | Payment or honoraria for lectures, presentations, speakers bureaus, manuscript writing or educational events | <input checked="" type="checkbox"/> None         |  |
| 6  | Payment for expert testimony                                                                                 | <input checked="" type="checkbox"/> None         |  |
| 7  | Support for attending meetings and/or travel                                                                 | <input type="checkbox"/> None<br>Gilead Sciences |  |
| 8  | Patents planned, issued or pending                                                                           | <input checked="" type="checkbox"/> None         |  |
| 9  | Participation on a Data Safety Monitoring Board or Advisory Board                                            | <input type="checkbox"/> None<br>Gilead Sciences |  |
| 10 | Leadership or fiduciary role in other board, society, committee or advocacy group, paid or unpaid            | <input type="checkbox"/> None<br>HBV Forum       |  |
| 11 | Stock or stock options                                                                                       | <input type="checkbox"/> None<br>Gilead Sciences |  |
| 12 | Receipt of equipment, materials, drugs, medical writing, gifts or other services                             | <input checked="" type="checkbox"/> None         |  |
| 13 | Other financial or non-financial interests                                                                   | <input checked="" type="checkbox"/> None         |  |

Please place an "X" next to the following statement to indicate your agreement:

I certify that I have answered every question and have not altered the wording of any of the questions on this form.

## ICMJE DISCLOSURE FORM

Date: 4/16/2021  
 Your Name: Patrick Marcellin  
 Manuscript Title: Characterization of the Liver Immune Microenvironment in Chronic HBV Infected Patient Liver Biopsies  
 Manuscript number (if known): JHEPR-D-21-00194R1

In the interest of transparency, we ask you to disclose all relationships/activities/interests listed below that are related to the content of your manuscript. "Related" means any relation with for-profit or not-for-profit third parties whose interests may be affected by the content of the manuscript. Disclosure represents a commitment to transparency and does not necessarily indicate a bias. If you are in doubt about whether to list a relationship/activity/interest, it is preferable that you do so.

The following questions apply to the author's relationships/activities/interests as they relate to the **current manuscript only**.

The author's relationships/activities/interests should be **defined broadly**. For example, if your manuscript pertains to the epidemiology of hypertension, you should declare all relationships with manufacturers of antihypertensive medication, even if that medication is not mentioned in the manuscript.

In item #1 below, report all support for the work reported in this manuscript without time limit. For all other items, the time frame for disclosure is the past 36 months.

|                                                           |                                                                                                                                                                                | Name all entities with whom you have this relationship or indicate none (add rows as needed) | Specifications/Comments (e.g., if payments were made to you or to your institution) |
|-----------------------------------------------------------|--------------------------------------------------------------------------------------------------------------------------------------------------------------------------------|----------------------------------------------------------------------------------------------|-------------------------------------------------------------------------------------|
| <b>Time frame: Since the initial planning of the work</b> |                                                                                                                                                                                |                                                                                              |                                                                                     |
| 1                                                         | All support for the present manuscript (e.g., funding, provision of study materials, medical writing, article processing charges, etc.)<br><b>No time limit for this item.</b> | <u>    </u> Gilead                                                                           | We helped collect the Biopsies at our site                                          |
|                                                           |                                                                                                                                                                                |                                                                                              |                                                                                     |
|                                                           |                                                                                                                                                                                |                                                                                              |                                                                                     |
|                                                           |                                                                                                                                                                                |                                                                                              |                                                                                     |
|                                                           |                                                                                                                                                                                |                                                                                              |                                                                                     |
|                                                           |                                                                                                                                                                                |                                                                                              |                                                                                     |
| <b>Time frame: past 36 months</b>                         |                                                                                                                                                                                |                                                                                              |                                                                                     |
| 2                                                         | Grants or contracts from any entity (if not indicated in item #1 above).                                                                                                       | <u>    </u> None                                                                             |                                                                                     |
|                                                           |                                                                                                                                                                                |                                                                                              |                                                                                     |
| 3                                                         | Royalties or licenses                                                                                                                                                          | <u>    </u> None                                                                             |                                                                                     |
|                                                           |                                                                                                                                                                                |                                                                                              |                                                                                     |
| 4                                                         | Consulting fees                                                                                                                                                                | <u>    </u> None                                                                             |                                                                                     |
|                                                           |                                                                                                                                                                                |                                                                                              |                                                                                     |

|    |                                                                                                              |                  |  |
|----|--------------------------------------------------------------------------------------------------------------|------------------|--|
|    |                                                                                                              |                  |  |
| 5  | Payment or honoraria for lectures, presentations, speakers bureaus, manuscript writing or educational events | <u>    </u> None |  |
|    |                                                                                                              |                  |  |
|    |                                                                                                              |                  |  |
| 6  | Payment for expert testimony                                                                                 | <u>    </u> None |  |
|    |                                                                                                              |                  |  |
|    |                                                                                                              |                  |  |
| 7  | Support for attending meetings and/or travel                                                                 | <u>    </u> None |  |
|    |                                                                                                              |                  |  |
|    |                                                                                                              |                  |  |
| 8  | Patents planned, issued or pending                                                                           | <u>    </u> None |  |
|    |                                                                                                              |                  |  |
|    |                                                                                                              |                  |  |
| 9  | Participation on a Data Safety Monitoring Board or Advisory Board                                            | <u>    </u> None |  |
|    |                                                                                                              |                  |  |
|    |                                                                                                              |                  |  |
| 10 | Leadership or fiduciary role in other board, society, committee or advocacy group, paid or unpaid            | <u>    </u> None |  |
|    |                                                                                                              |                  |  |
|    |                                                                                                              |                  |  |
| 11 | Stock or stock options                                                                                       | <u>    </u> None |  |
|    |                                                                                                              |                  |  |
|    |                                                                                                              |                  |  |
| 12 | Receipt of equipment, materials, drugs, medical writing, gifts or other services                             | <u>    </u> None |  |
|    |                                                                                                              |                  |  |
|    |                                                                                                              |                  |  |
| 13 | Other financial or non-financial interests                                                                   | <u>    </u> None |  |
|    |                                                                                                              |                  |  |
|    |                                                                                                              |                  |  |

Please place an "X" next to the following statement to indicate your agreement:

  X   I certify that I have answered every question and have not altered the wording of any of the questions on this form.



## ICMJE DISCLOSURE FORM

Date: August 16, 2021

Your Name: Henry LY Chan

Manuscript Title: Performance evaluation of the Elecsys PIVKA-II and Elecsys AFP assays for hepatocellular carcinoma diagnosis

Manuscript number (if known): \_\_\_\_\_

In the interest of transparency, we ask you to disclose all relationships/activities/interests listed below that are related to the content of your manuscript. "Related" means any relation with for-profit or not-for-profit third parties whose interests may be affected by the content of the manuscript. Disclosure represents a commitment to transparency and does not necessarily indicate a bias. If you are in doubt about whether to list a relationship/activity/interest, it is preferable that you do so.

The following questions apply to the author's relationships/activities/interests as they relate to the current manuscript only.

The author's relationships/activities/interests should be defined broadly. For example, if your manuscript pertains to the epidemiology of hypertension, you should declare all relationships with manufacturers of antihypertensive medication, even if that medication is not mentioned in the manuscript.

In item #1 below, report all support for the work reported in this manuscript without time limit. For all other items, the time frame for disclosure is the past 36 months.

|                                                           |                                                                                                                                                                                | Name all entities with whom you have this relationship or indicate none (add rows as needed) | Specifications/Comments (e.g., if payments were made to you or to your institution) |
|-----------------------------------------------------------|--------------------------------------------------------------------------------------------------------------------------------------------------------------------------------|----------------------------------------------------------------------------------------------|-------------------------------------------------------------------------------------|
| <b>Time frame: Since the initial planning of the work</b> |                                                                                                                                                                                |                                                                                              |                                                                                     |
| 1                                                         | All support for the present manuscript (e.g., funding, provision of study materials, medical writing, article processing charges, etc.)<br><b>No time limit for this item.</b> | This study was funded by Roche Diagnostics GmbH (Penzberg, Germany)                          |                                                                                     |
|                                                           |                                                                                                                                                                                |                                                                                              |                                                                                     |
|                                                           |                                                                                                                                                                                |                                                                                              |                                                                                     |
|                                                           |                                                                                                                                                                                |                                                                                              |                                                                                     |
|                                                           |                                                                                                                                                                                |                                                                                              |                                                                                     |
|                                                           |                                                                                                                                                                                |                                                                                              |                                                                                     |
| <b>Time frame: past 36 months</b>                         |                                                                                                                                                                                |                                                                                              |                                                                                     |
| 2                                                         | Grants or contracts from any entity (if not indicated in item #1 above).                                                                                                       | ___ None                                                                                     |                                                                                     |
|                                                           |                                                                                                                                                                                |                                                                                              |                                                                                     |
|                                                           |                                                                                                                                                                                |                                                                                              |                                                                                     |
| 3                                                         | Royalties or licenses                                                                                                                                                          | ___ None                                                                                     |                                                                                     |
|                                                           |                                                                                                                                                                                |                                                                                              |                                                                                     |

|    |                                                                                                              |                            |                     |
|----|--------------------------------------------------------------------------------------------------------------|----------------------------|---------------------|
|    |                                                                                                              |                            |                     |
| 4  | Consulting fees                                                                                              | Advisor of GRAIL and Roche | Personal honorarium |
|    |                                                                                                              |                            |                     |
|    |                                                                                                              |                            |                     |
| 5  | Payment or honoraria for lectures, presentations, speakers bureaus, manuscript writing or educational events | Lecture for Roche          | Personal honorarium |
|    |                                                                                                              |                            |                     |
|    |                                                                                                              |                            |                     |
| 6  | Payment for expert testimony                                                                                 | ___ None                   |                     |
|    |                                                                                                              |                            |                     |
|    |                                                                                                              |                            |                     |
| 7  | Support for attending meetings and/or travel                                                                 | ___ None                   |                     |
|    |                                                                                                              |                            |                     |
|    |                                                                                                              |                            |                     |
| 8  | Patents planned, issued or pending                                                                           | ___ None                   |                     |
|    |                                                                                                              |                            |                     |
|    |                                                                                                              |                            |                     |
| 9  | Participation on a Data Safety Monitoring Board or Advisory Board                                            | ___ None                   |                     |
|    |                                                                                                              |                            |                     |
|    |                                                                                                              |                            |                     |
| 10 | Leadership or fiduciary role in other board, society, committee or advocacy group, paid or unpaid            | ___ None                   |                     |
|    |                                                                                                              |                            |                     |
|    |                                                                                                              |                            |                     |
| 11 | Stock or stock options                                                                                       | ___ None                   |                     |
|    |                                                                                                              |                            |                     |
|    |                                                                                                              |                            |                     |
| 12 | Receipt of equipment, materials, drugs, medical writing, gifts or other services                             | ___ None                   |                     |
|    |                                                                                                              |                            |                     |
|    |                                                                                                              |                            |                     |
| 13 | Other financial or non-financial interests                                                                   | ___ None                   |                     |
|    |                                                                                                              |                            |                     |
|    |                                                                                                              |                            |                     |

Please place an "X" next to the following statement to indicate your agreement:

I certify that I have answered every question and have not altered the wording of any of the questions on this form.
